# Supplementary material
Source: Royal Society of Chemistry journal article supplement (doi:10.1039/d6cy00332j)
Supplement: d6cy00332j1.pdf [file d6cy00332j1.pdf]

## Supporting information

### **Pd(II)-catalyzed ethylene/methyl acrylate copolymerization: toward catalyst recovery and recycle.**

Karim Abdel Hady,<sup>1,2</sup> Daniele Quattrin,<sup>1</sup> Linda de Marchi,<sup>1</sup> Enzo Alessio,<sup>1</sup> Barbara Milani<sup>1,\*</sup>

<sup>1</sup>Dipartimento di Scienze Chimiche e Farmaceutiche, Università degli Studi di Trieste, Via Licio Giorgieri 1, 34127 Trieste, Italy.

<sup>2</sup>Consorzio Interuniversitario Reattività Chimica e Catalisi CIRCC, Via Celso Ulpiani 27, 70126 Bari, Italy.

email: milaniba@units.it

|                                                                |            |
|----------------------------------------------------------------|------------|
| <b>NMR Characterization of ligands and complexes</b>           | <b>S2</b>  |
| <b>Ethylene/methyl acrylate copolymerization experiments</b>   | <b>S10</b> |
| <b>GPC Characterization of the synthesized E/MA copolymers</b> | <b>S14</b> |
| <b>NMR Characterization of the synthesized E/MA copolymers</b> | <b>S16</b> |
| <b>NMR spectra of in-situ reaction between Pd1b and MA</b>     | <b>S22</b> |
| <b>NMR spectrum of lower phase of catalytic run 1</b>          | <b>S32</b> |
| <b>References</b>                                              | <b>S33</b> |

## NMR characterization of ligands and complexes

NMR spectra of both ligands and complexes were in agreement to literature.<sup>1-5</sup>

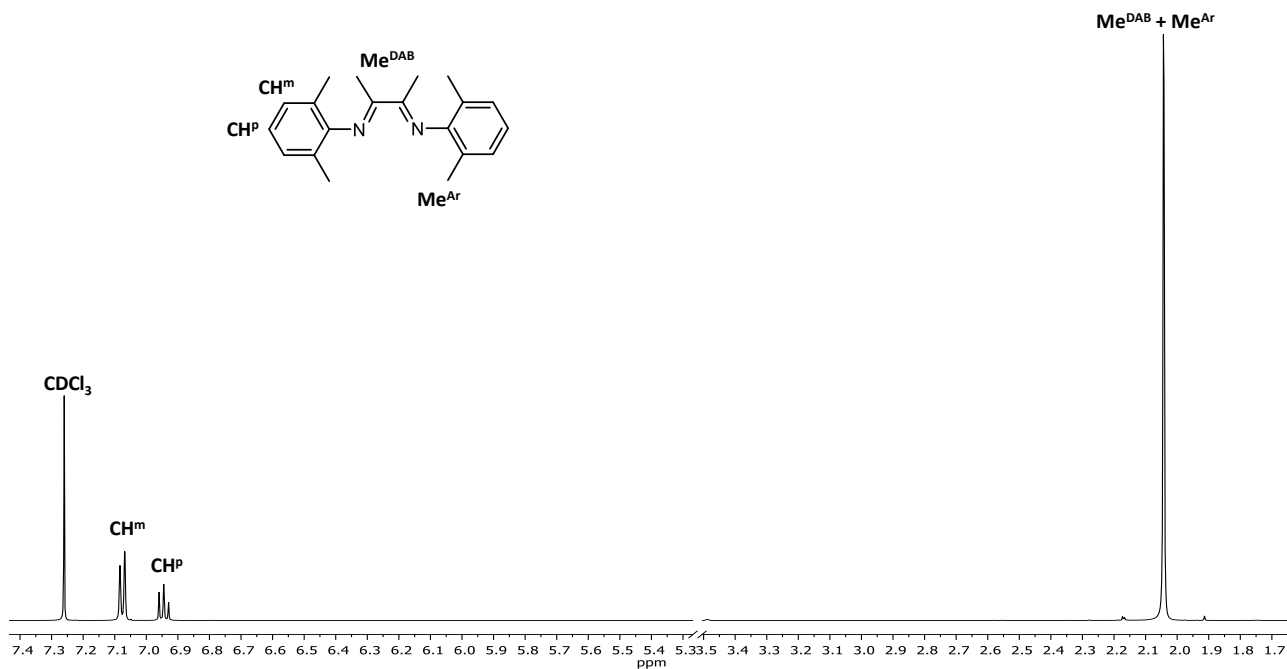

Figure S1 <sup>1</sup>H NMR spectrum (CDCl<sub>3</sub>, 298 K) of **1**.

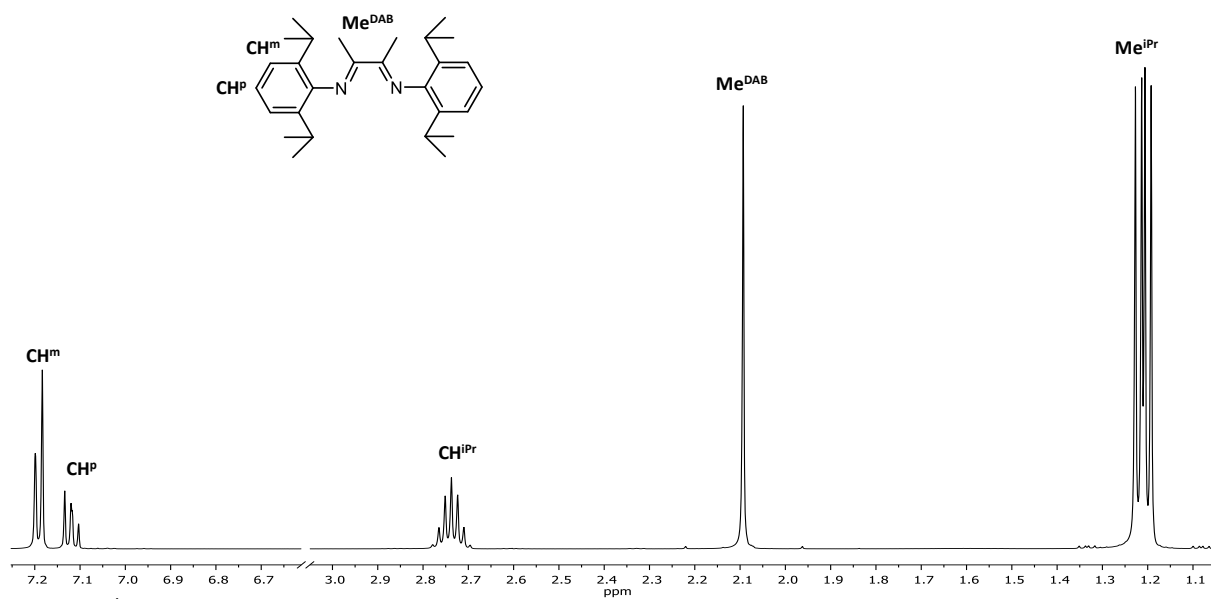

Figure S2 <sup>1</sup>H NMR spectrum (CDCl<sub>3</sub>, 298 K) of **2**.

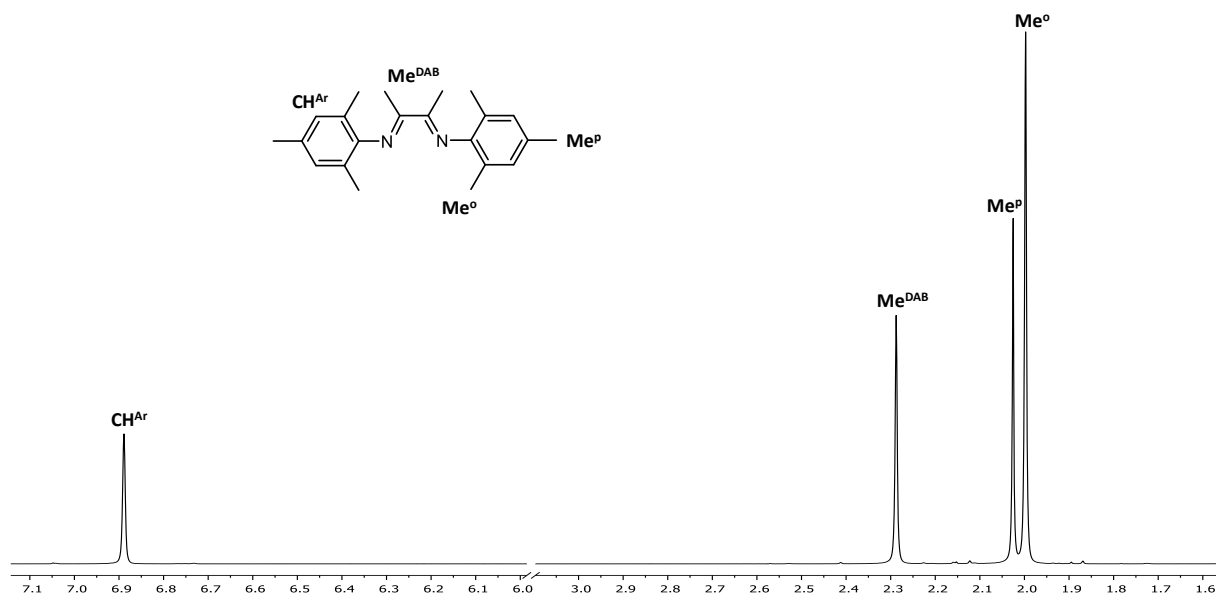

**Figure S3**  $^1\text{H}$  NMR spectrum (CDCl<sub>3</sub>, 298 K) of **3**.

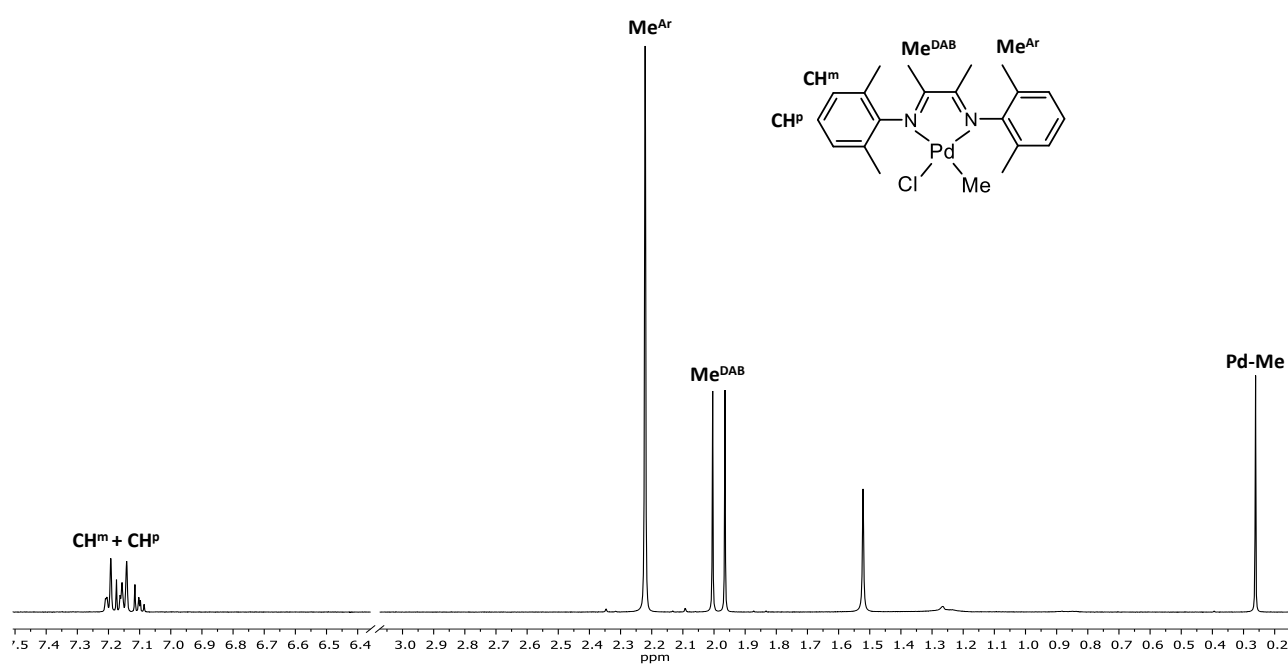

**Figure S4**  $^1\text{H}$  NMR spectrum (CD<sub>2</sub>Cl<sub>2</sub>, 298 K) of **Pd1a**.

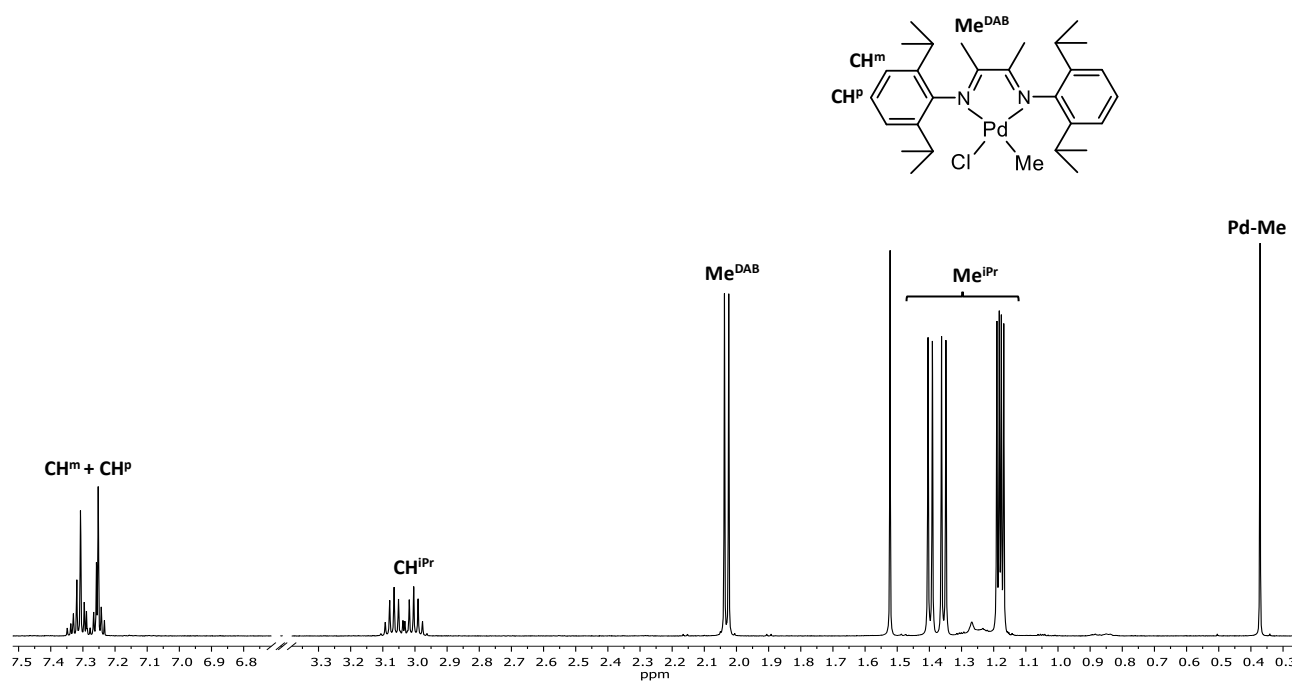

**Figure S5**  $^1\text{H}$  NMR spectrum ( $\text{CD}_2\text{Cl}_2$ , 298 K) of **Pd2a**.

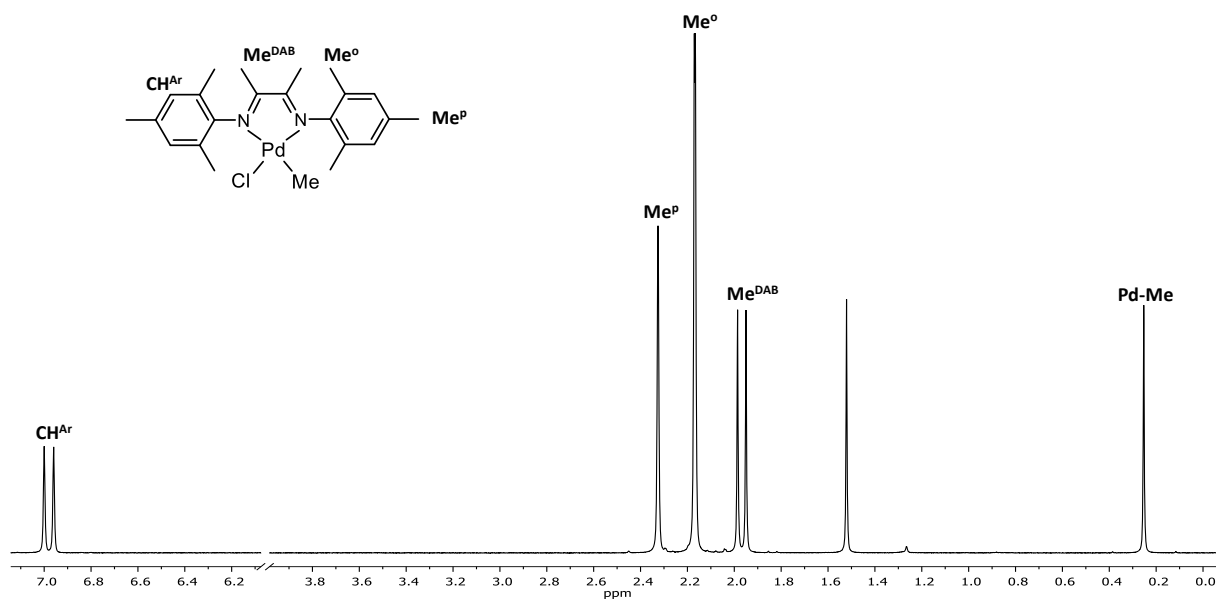

**Figure S6**  $^1\text{H}$  NMR spectrum ( $\text{CD}_2\text{Cl}_2$ , 298 K) of **Pd3a**.

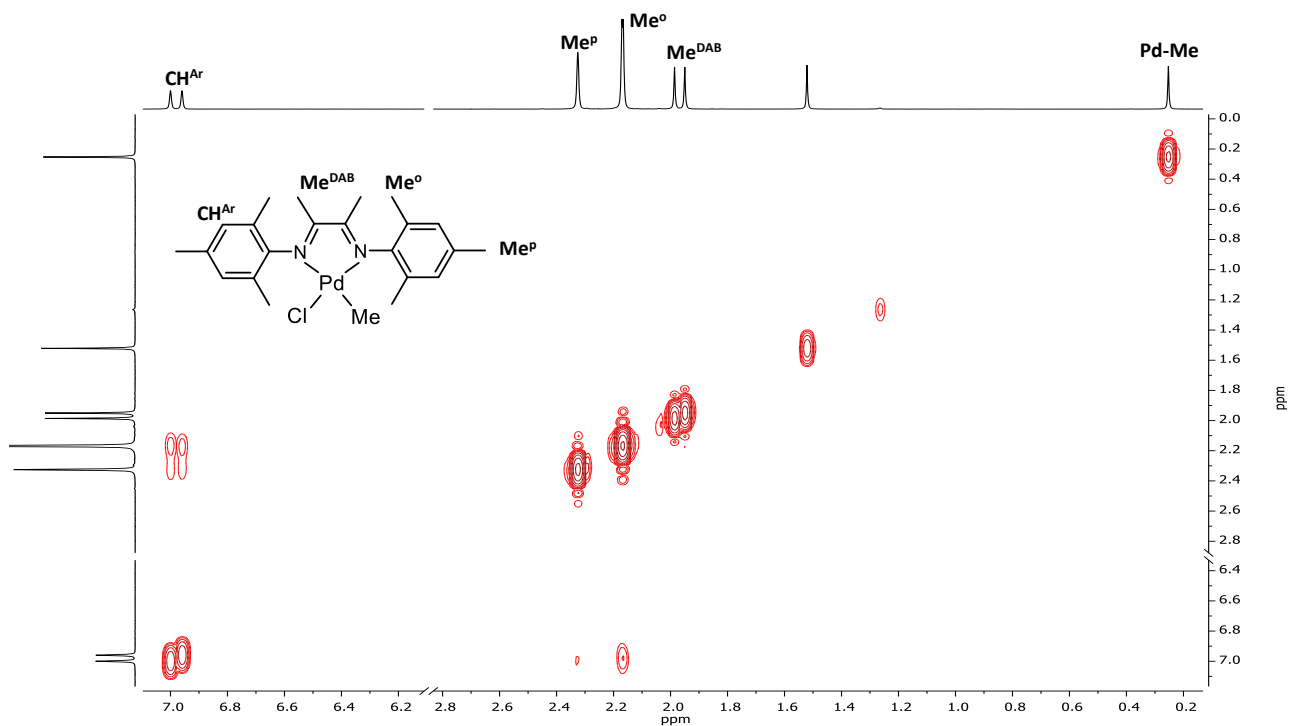

Figure S7  $^1\text{H}$ ,  $^1\text{H}$  COSY NMR spectrum ( $\text{CD}_2\text{Cl}_2$ , 298 K) of Pd3a.

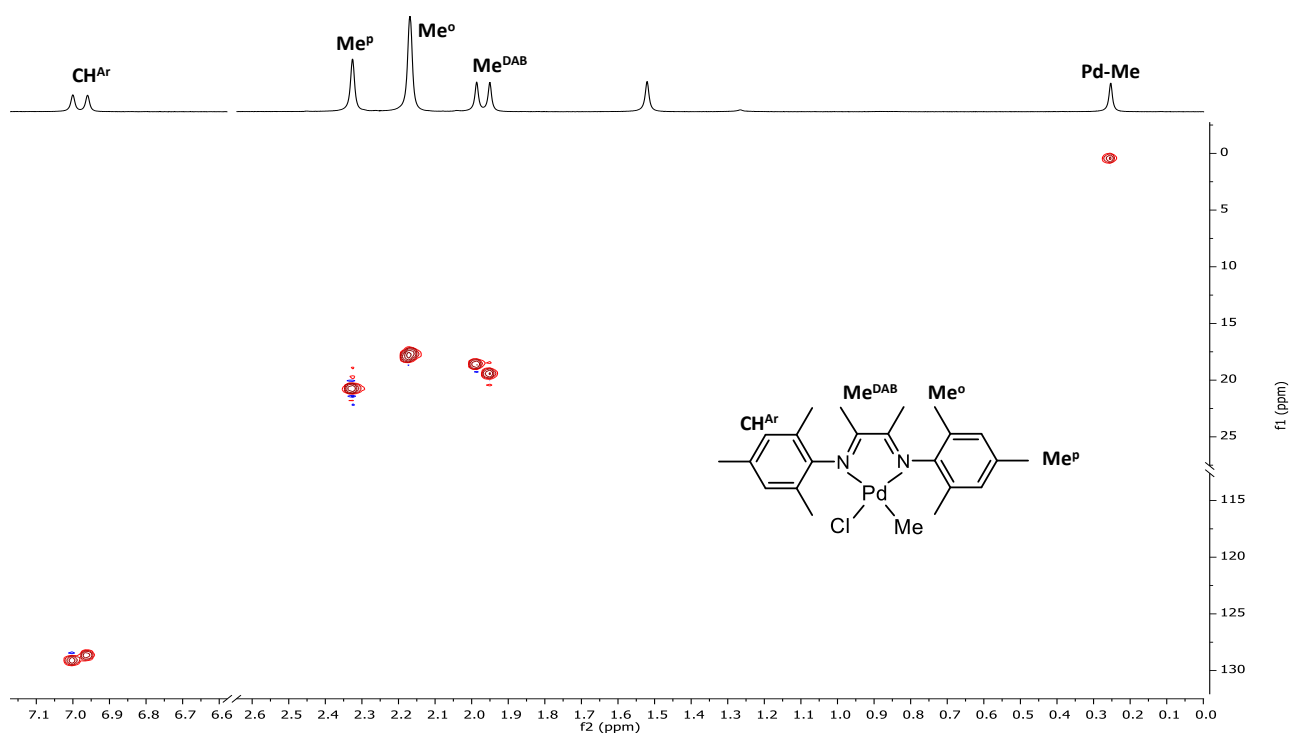

Figure S8  $^1\text{H}$ ,  $^{13}\text{C}$  HSQC NMR spectrum ( $\text{CD}_2\text{Cl}_2$ , 298 K) of Pd3a.

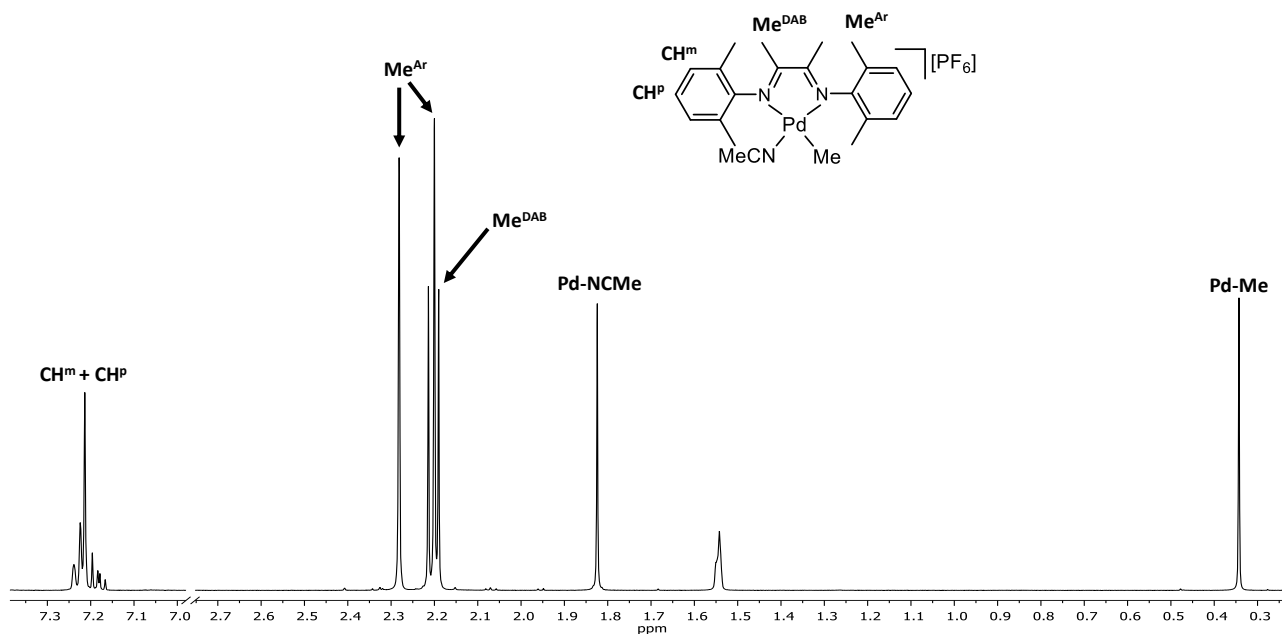

Figure S9  $^1\text{H}$  NMR spectrum ( $\text{CD}_2\text{Cl}_2$ , 298 K) of **Pd1b**.

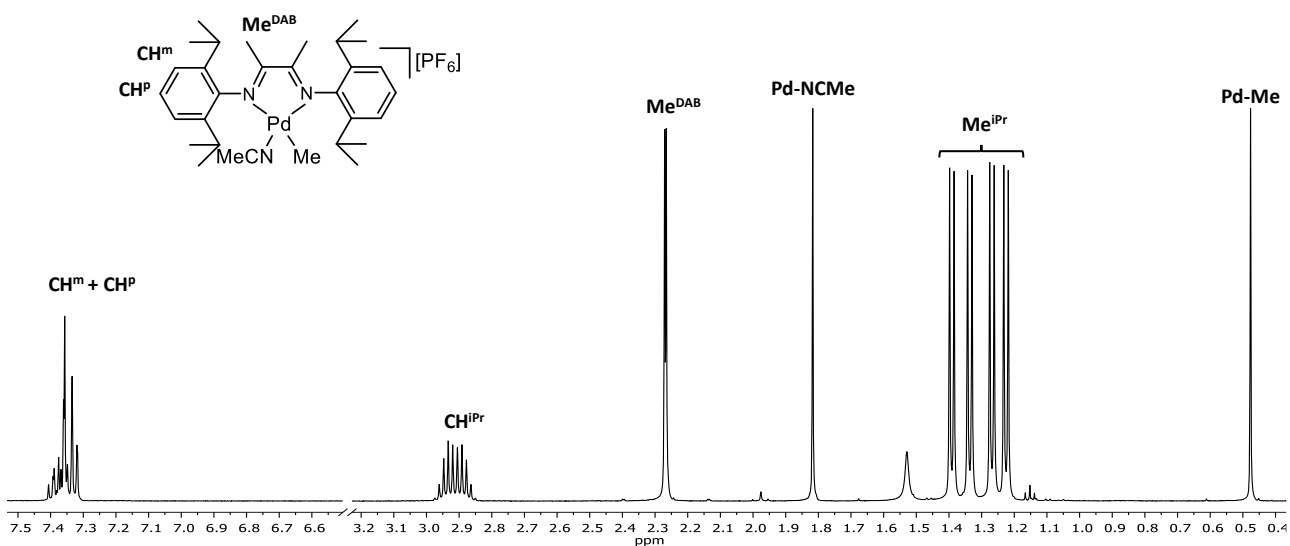

Figure S10  $^1\text{H}$  NMR spectrum ( $\text{CD}_2\text{Cl}_2$ , 298 K) of **Pd2b**.

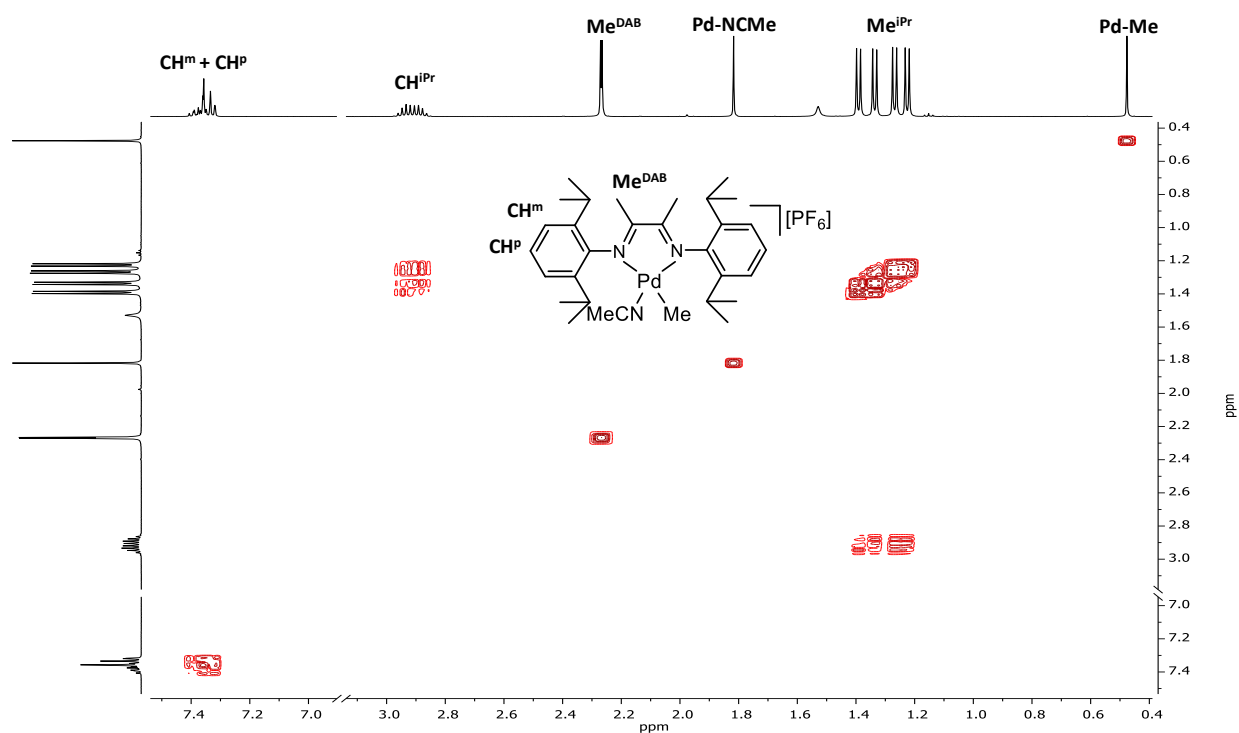

Figure S11  $^1\text{H}, ^1\text{H}$  COSY NMR spectrum ( $\text{CD}_2\text{Cl}_2$ , 298 K) of **Pd2b**.

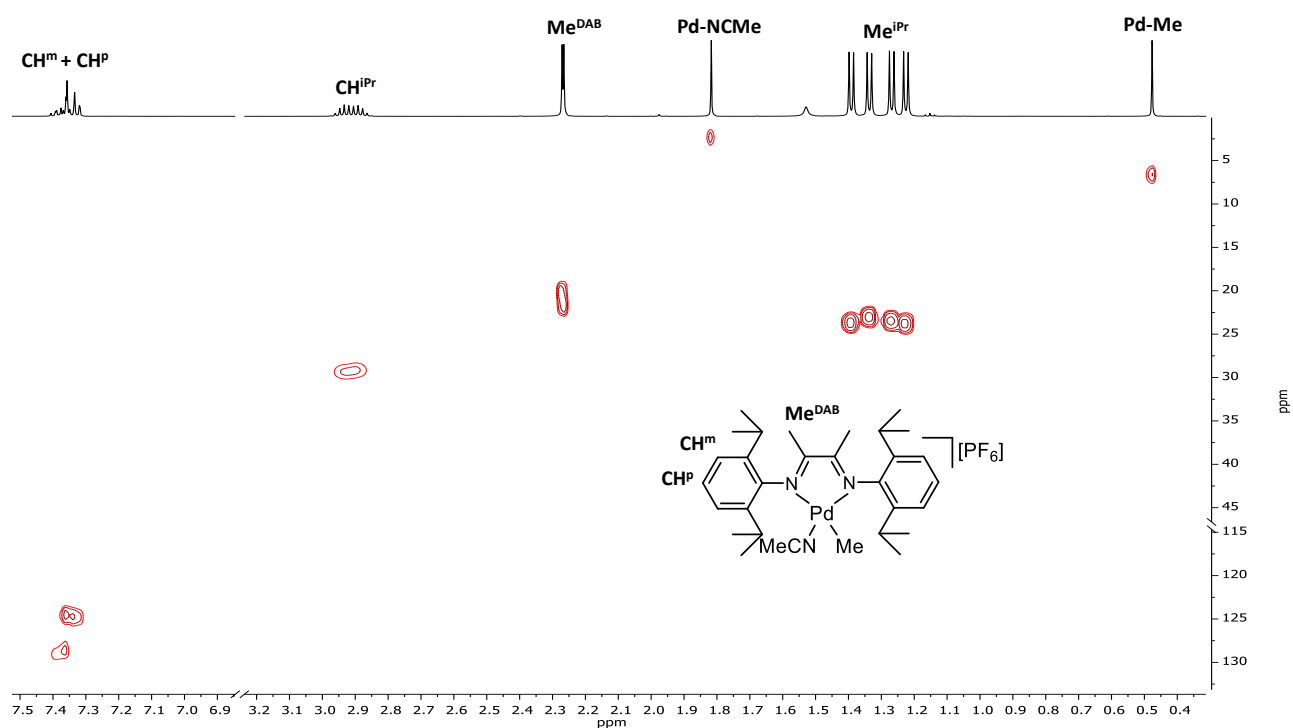

Figure S12  $^1\text{H}, ^{13}\text{C}$  HSQC NMR spectrum ( $\text{CD}_2\text{Cl}_2$ , 298 K) of **Pd2b**.

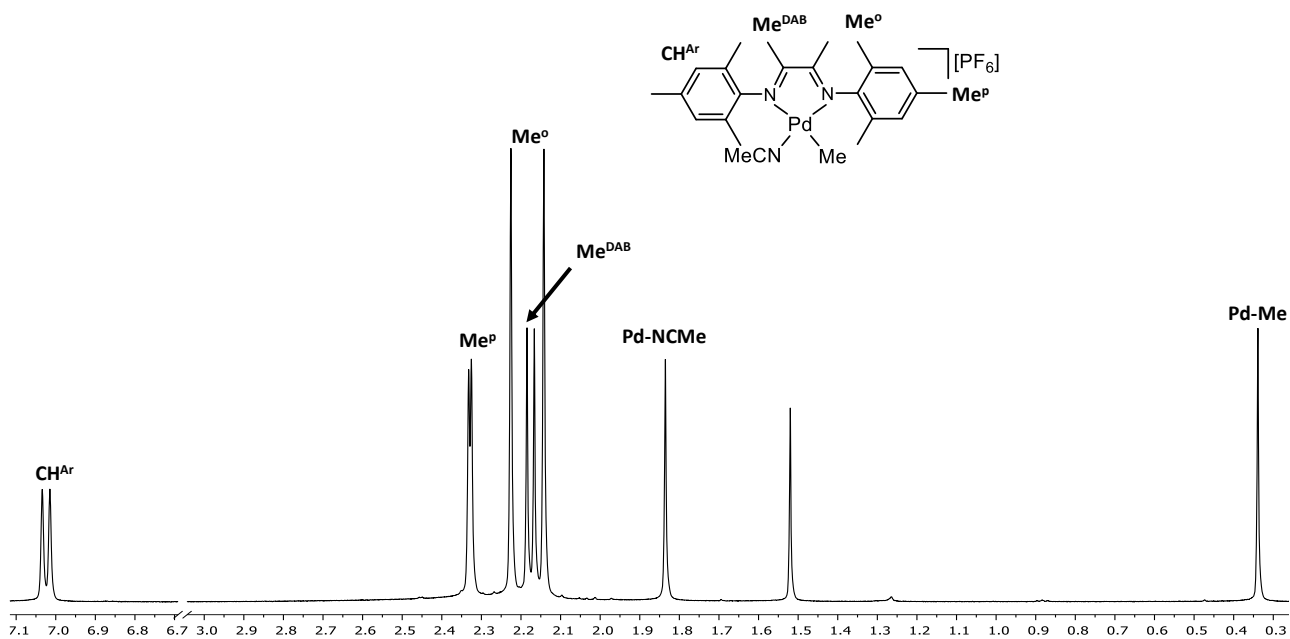

Figure S13  $^1\text{H}$  NMR spectrum ( $\text{CD}_2\text{Cl}_2$ , 298 K) of **Pd3b**.

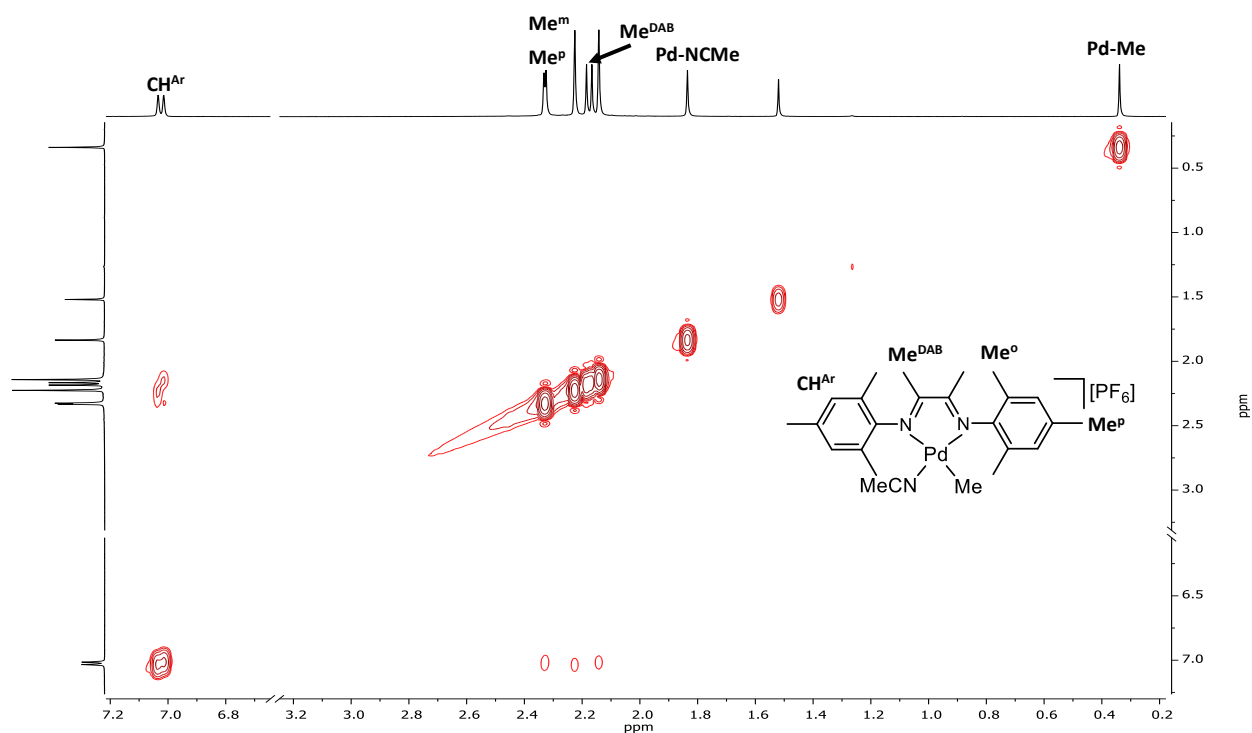

Figure S14  $^1\text{H}$ ,  $^1\text{H}$  COSY NMR spectrum ( $\text{CD}_2\text{Cl}_2$ , 298 K) of **Pd3b**.

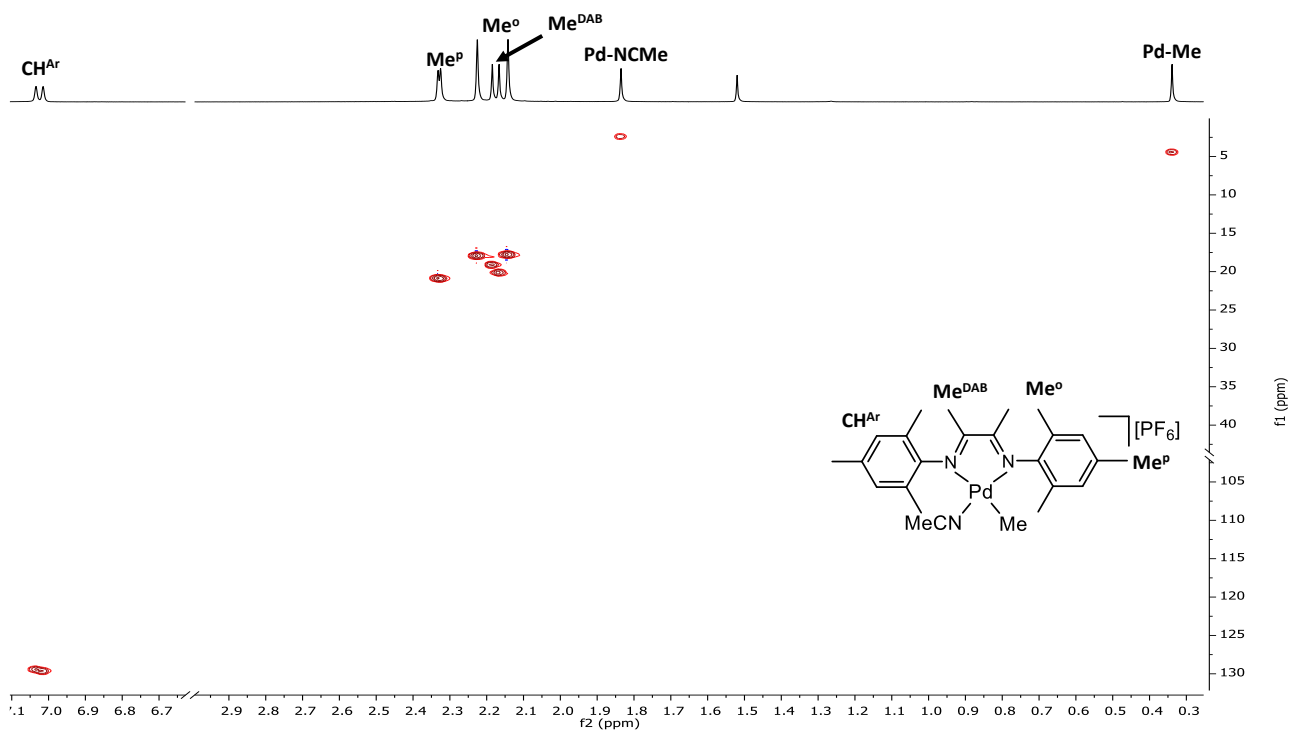

Figure S15  $^1\text{H}$ ,  $^{13}\text{C}$  HSQC NMR spectrum ( $\text{CD}_2\text{Cl}_2$ , 298 K) of **Pd3b**.

## Ethylene/methyl acrylate copolymerization experiments

**Table S1** Ethylene/methyl acrylate copolymerization: effect of solvent composition.<sup>[a]</sup>

Precatalyst: [Pd(1)(Me)(MeCN)][PF<sub>6</sub>] **Pd1b**.

| entry             | $\chi_{\text{TFE}}^{[b]}$ | yield<br>[g] | kg<br>CP/mol<br>Pd <sup>[c]</sup> | mol %<br>MA <sup>[d]</sup> | M(MA):T(MA) <sup>[e]</sup> | $M_n^{[f]}$ [kDa]<br>( $M_w/M_n$ ) | Bd <sup>[g]</sup> |
|-------------------|---------------------------|--------------|-----------------------------------|----------------------------|----------------------------|------------------------------------|-------------------|
| 1 <sup>[h]</sup>  | 0.00                      | 1.04         | 49.4                              | 4.8                        | 12:88                      | 5.0 (2.00)                         | 93                |
| 2                 | 0.09                      | 2.42         | 114.9                             | 3.0                        | 14:85                      | 16.6 (1.69)                        | 99                |
| 3                 | 0.17                      | 2.97         | 141.8                             | 2.4                        | 15:85                      | 18.2 (1.72)                        | 101               |
| 4                 | 0.26                      | 2.67         | 126.9                             | 2.8                        | 13:87                      | 18.2 (1.70)                        | 102               |
| 5                 | 0.35                      | 1.89         | 89.7                              | 4.1                        | 10:90                      | 18.8 (1.53)                        | 99                |
| 6                 | 0.47                      | 2.86         | 136.1                             | 2.3                        | 18:82                      | 18.5 (1.54)                        | 104               |
| 7                 | 0.59                      | 2.41         | 115.1                             | 2.4                        | 21:79                      | 19.3 (1.60)                        | 103               |
| 8                 | 0.79                      | 1.94         | 92.3                              | 2.9                        | 26:74                      | 23.2 (1.70)                        | 100               |
| 9                 | 0.89                      | 1.61         | 76.6                              | 2.8                        | 28:72                      | 24.3 (1.75)                        | 100               |
| 10 <sup>[h]</sup> | 1.00                      | 1.02         | 48.8                              | 4.0                        | 40:60                      | 23.4 (1.19)                        | 93                |

<sup>[a]</sup>Reaction conditions:  $n_{\text{Pd}} = 2.1 \cdot 10^{-5}$  mol,  $V_{\text{sol}} = 21$  mL,  $V_{\text{MA}} = 2.26$  mL,  $[\text{MA}]/[\text{Pd}] = 1188$ ,  $T = 308$  K,  $P_E = 5$  bar,  $t = 6$  h; <sup>[b]</sup> $\chi_{\text{TFE}} = n_{\text{TFE}}/(n_{\text{DCM}} + n_{\text{TFE}})$ ; <sup>[c]</sup>productivity as kg CP/mol Pd = kilograms of copolymer per mol of palladium; <sup>[d]</sup>calculated by <sup>1</sup>H NMR spectroscopy on isolated product; <sup>[e]</sup>calculated by <sup>13</sup>C NMR spectroscopy on isolated product; <sup>[f]</sup>molecular weight ( $M_n$  and  $M_w$ ) and molecular weight distribution ( $M_w/M_n$ ) were measured by GPC; <sup>[g]</sup>Bd = branching degree as branches per 1000 carbon atoms, calculated by <sup>1</sup>H NMR spectroscopy on isolated product; <sup>[h]</sup>from reference 4.

**Table S2** Ethylene/methyl acrylate copolymerization: effect of solvent composition.<sup>[a]</sup>Precatalyst: [Pd(3)(Me)(MeCN)][PF<sub>6</sub>] **Pd3b**.

| entry | $\chi_{\text{TFE}}^{[b]}$ | yield<br>[g] | kg<br>CP/mol<br>Pd <sup>[c]</sup> | mol %<br>MA <sup>[d]</sup> | M(MA):T(MA) <sup>[e]</sup> | M <sub>n</sub> <sup>[f]</sup> [kDa]<br>(M <sub>w</sub> /M <sub>n</sub> ) | Bd <sup>[g]</sup> |
|-------|---------------------------|--------------|-----------------------------------|----------------------------|----------------------------|--------------------------------------------------------------------------|-------------------|
| 1     | 0.00                      | 1.39         | 66.0                              | 3.9                        | 22:78                      | 14.1 (1.68)                                                              | 91                |
| 2     | 0.17                      | 2.61         | 124.3                             | 2.6                        | 21:79                      | 19.5 (1.80)                                                              | 100               |
| 3     | 0.35                      | 2.06         | 98.3                              | 3.4                        | 15:85                      | 19.8 (1.83)                                                              | 99                |
| 4     | 0.47                      | 2.45         | 116.9                             | 2.7                        | 24:76                      | 20.5 (1.87)                                                              | 100               |
| 5     | 1.00                      | 1.38         | 50.1                              | 3.5                        | 49:51                      | 27.5 (1.98)                                                              | 100               |

<sup>[a]</sup>Reaction conditions:  $n_{\text{Pd}} = 2.1 \cdot 10^{-5}$  mol,  $V_{\text{sol}} = 21$  mL,  $V_{\text{MA}} = 2.26$  mL,  $[\text{MA}]/[\text{Pd}] = 1188$ ,  $T = 308$  K,  $P_{\text{E}} = 5$  bar,  $t = 6$  h; <sup>[b]</sup> $\chi_{\text{TFE}} = n_{\text{TFE}}/(n_{\text{DCM}} + n_{\text{TFE}})$ ; <sup>[c]</sup>productivity as kg CP/mol Pd = kilograms of copolymer per mol of palladium; <sup>[d]</sup>calculated by <sup>1</sup>H NMR spectroscopy on isolated product; <sup>[e]</sup>calculated by <sup>13</sup>C NMR spectroscopy on isolated product; <sup>[f]</sup>molecular weight (M<sub>n</sub> and M<sub>w</sub>) and molecular weight distribution (M<sub>w</sub>/M<sub>n</sub>) were measured by GPC; <sup>[g]</sup>Bd = branching degree as branches per 1000 carbon atoms, calculated by <sup>1</sup>H NMR spectroscopy on isolated product.

**Table S3** Ethylene/methyl acrylate copolymerization: effect of solvent composition.<sup>[a]</sup>  
 Precatalyst: [Pd(2)(Me)(MeCN)][PF<sub>6</sub>] **Pd2b**.

| entry | $\chi_{\text{TFE}}^{[b]}$ | yield<br>[g] | kg<br>CP/mol<br>Pd <sup>[c]</sup> | mol %<br>MA <sup>[d]</sup> | M(MA):T(MA) <sup>[e]</sup> | $M_n^{[f]}$ [kDa]<br>( $M_w/M_n$ ) | Bd <sup>[g]</sup> |
|-------|---------------------------|--------------|-----------------------------------|----------------------------|----------------------------|------------------------------------|-------------------|
| 1     | 0.00                      | 2.28         | 108.2                             | 1.2                        | 13:87                      | 2.9 (1.88)                         | 89                |
| 2     | 0.09                      | 4.51         | 215.4                             | 0.9                        | 12:88                      | 18.4 (1.67)                        | 95                |
| 3     | 0.17                      | 1.80         | 85.9                              | 1.8                        | 6:94                       | 38.8 (1.38)                        | 93                |
| 4     | 0.26                      | 1.78         | 85.1                              | 1.8                        | 7:93                       | 39.3 (1.80)                        | 93                |
| 5     | 0.35                      | 3.27         | 155.8                             | 1.0                        | 12:88                      | 40.0 (1.56)                        | 95                |
| 6     | 0.47                      | 5.50         | 262.3                             | 0.7                        | 17:83                      | 43.5 (1.51)                        | 96                |
| 7     | 0.59                      | 4.70         | 224.4                             | 0.8                        | 17:83                      | 71.4 (1.66)                        | 96                |
| 8     | 0.79                      | 4.30         | 204.5                             | 0.9                        | 24:76                      | 105.2 (1.96)                       | 97                |
| 9     | 0.89                      | 3.70         | 175.7                             | 1.0                        | 21:79                      | 102.4 (1.87)                       | 98                |
| 10    | 1.00                      | 3.07         | 146.2                             | 1.1                        | 28:72                      | 101.2 (1.72)                       | 100               |

<sup>[a]</sup>Reaction conditions:  $n_{\text{Pd}} = 21 \cdot 10^{-5}$  mol,  $V_{\text{sol}} = 21$  mL,  $V_{\text{MA}} = 2.26$  mL,  $[\text{MA}]/[\text{Pd}] = 1188$ ,  $T = 308$  K,  $P_E = 5$  bar,  $t = 6$  h; <sup>[b]</sup> $\chi_{\text{TFE}} = n_{\text{TFE}}/(n_{\text{DCM}} + n_{\text{TFE}})$ ; <sup>[c]</sup>productivity as kg CP/mol Pd = kilograms of copolymer per mol of palladium; <sup>[d]</sup>calculated by <sup>1</sup>H NMR spectroscopy on isolated product; <sup>[e]</sup>calculated by <sup>13</sup>C NMR spectroscopy on isolated product; <sup>[f]</sup>molecular weight ( $M_n$  and  $M_w$ ) and molecular weight distribution ( $M_w/M_n$ ) were measured by GPC; <sup>[g]</sup>Bd = branching degree as branches per 1000 carbon atoms, calculated by <sup>1</sup>H NMR spectroscopy on isolated product.

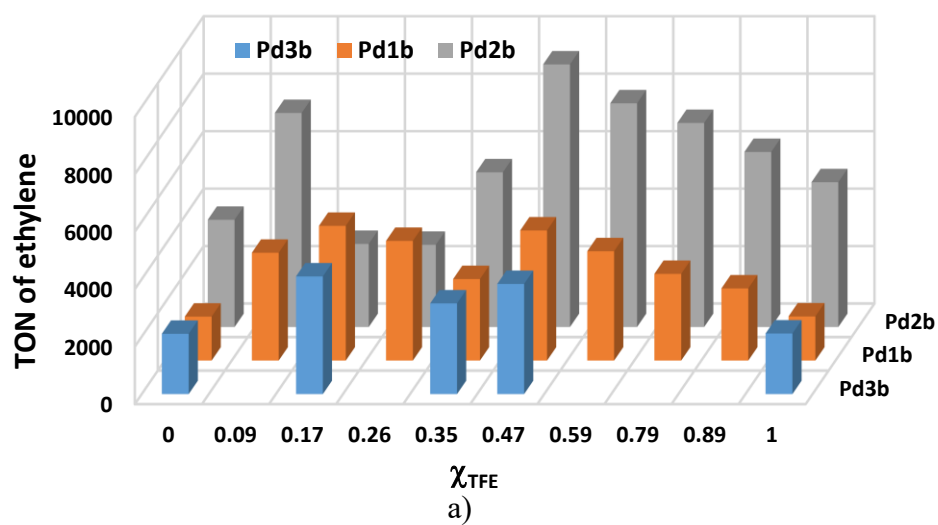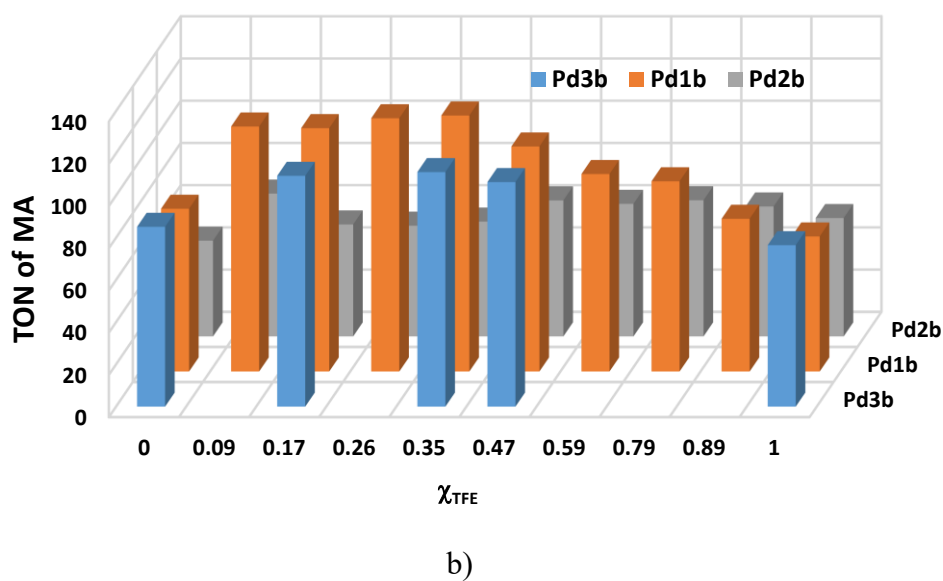

**Figure S16** Ethylene/methyl acrylate copolymerization: effect of the reaction medium composition on TON (Turnover Number = mol of comonomer converted per mol of palladium) of: a) ethylene; b) methyl acrylate. Reaction conditions: see Table S1.

## GPC characterization of the synthesized E/MA copolymers

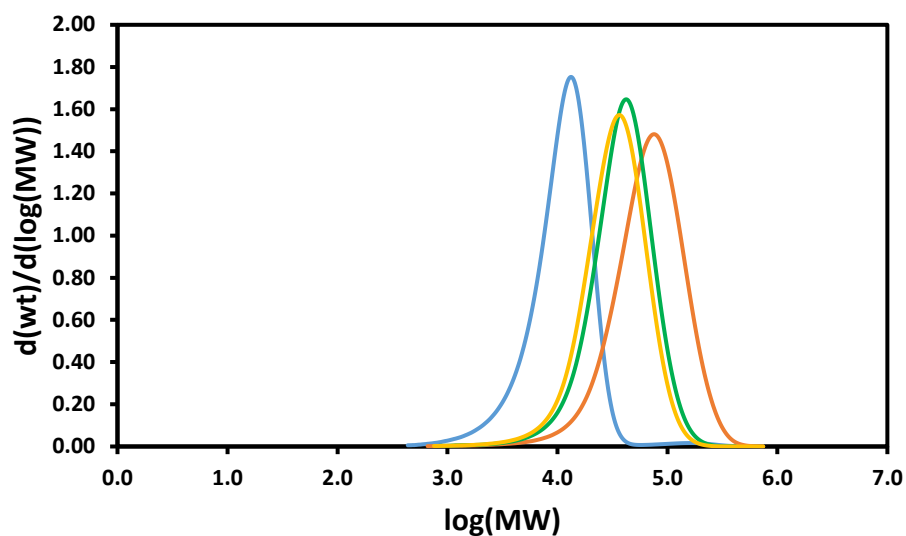

**Figure S17** GPC curves of the ethylene/methyl acrylate copolymers obtained with **Pd1b** in: neat DCM (blue trace), neat TFE (orange trace), DCM/TFE mixture  $\chi_{\text{TFE}} = 0.17$  (green trace), DCM/TFE mixture  $\chi_{\text{TFE}} = 0.47$  (yellow trace). Reaction conditions: Table S1.

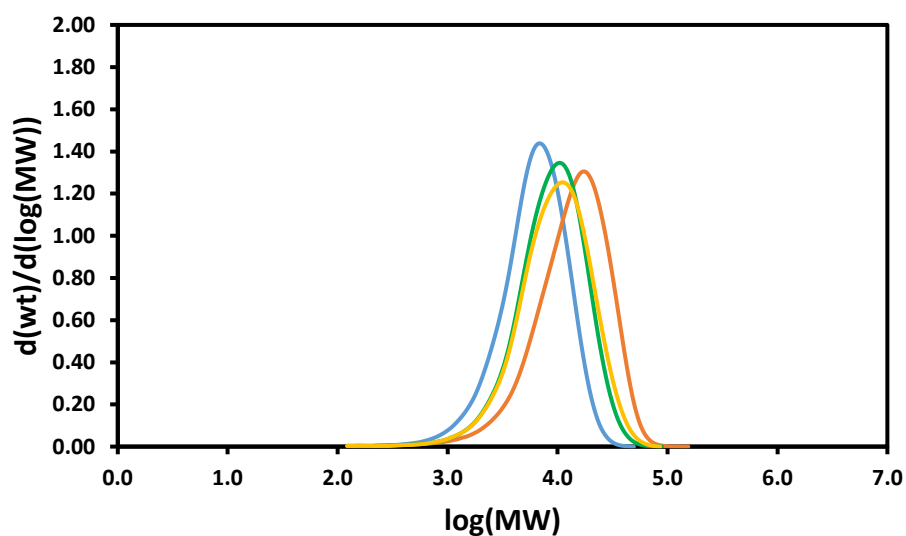

**Figure S18** GPC curves of the ethylene/methyl acrylate copolymers obtained with **Pd3b** in: neat DCM (blue trace), neat TFE (orange trace), DCM/TFE mixture  $\chi_{\text{TFE}} = 0.17$  (green trace), DCM/TFE mixture  $\chi_{\text{TFE}} = 0.47$  (yellow trace). Reaction conditions: Table S2.

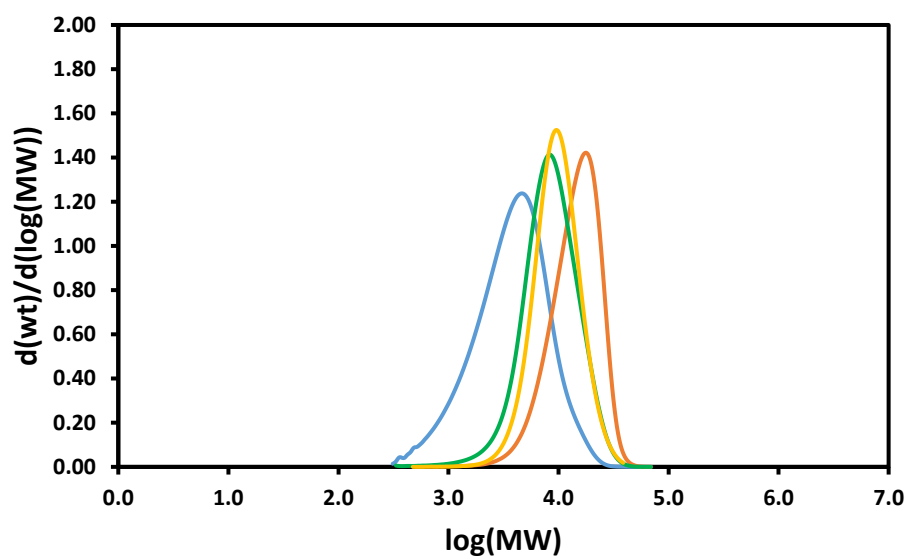

**Figure S19** GPC curves of the ethylene/methyl acrylate copolymers obtained with **Pd2b** in: neat DCM (blue trace), neat TFE (orange trace), DCM/TFE mixture  $\chi_{\text{TFE}} = 0.09$  (green trace), DCM/TFE mixture  $\chi_{\text{TFE}} = 0.47$  (yellow trace). Reaction conditions: Table S3.

## NMR characterization of the synthesized E/MA copolymers

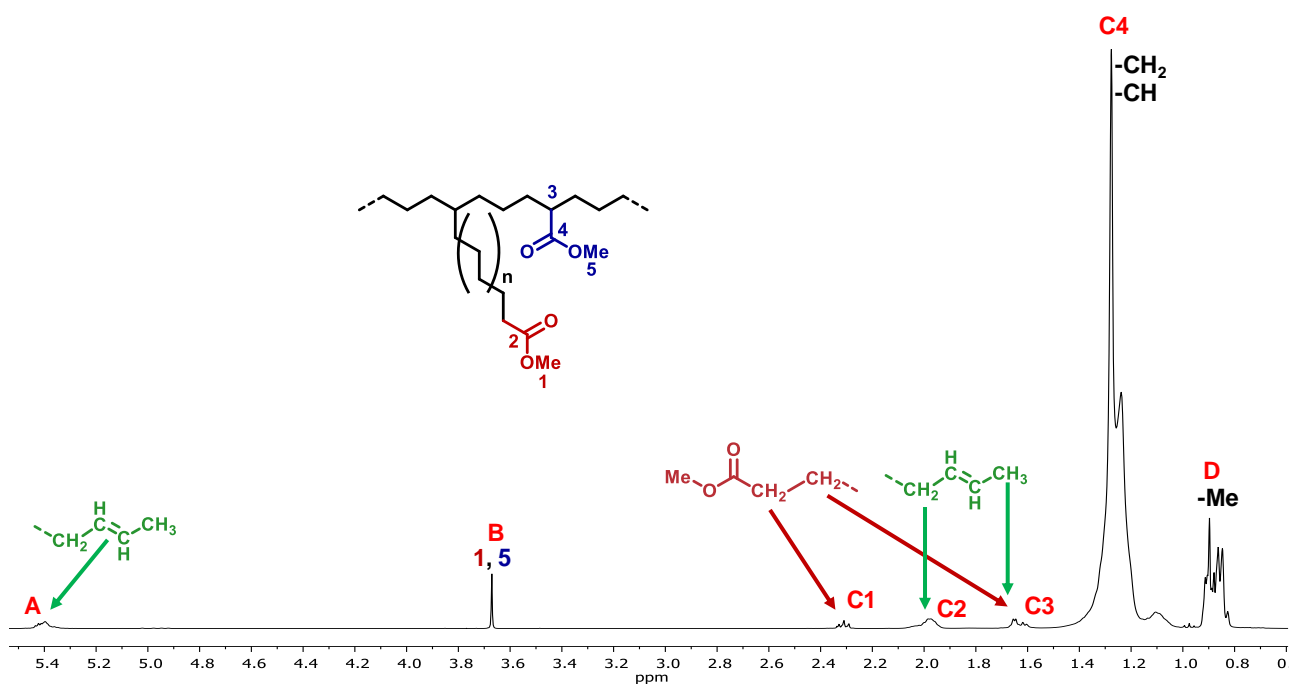

**Figure S20**  $^1\text{H}$  NMR spectrum ( $\text{CDCl}_3$ , 298 K) of ethylene/methyl acrylate copolymer obtained with **Pd2b** in neat DCM (Table S3, entry 1).

**Formulas used to calculate the amount of inserted MA and branching degree.**

$$\% \text{ MA} = \frac{\frac{1}{3}B}{\left[\frac{1}{4}(A + C + D - B) + \frac{1}{3}B\right]} \cdot 100$$

$$C = C1 + C2 + C3 + C4$$

$$\frac{\text{Branches}}{1000C} = \frac{I_{\text{CH}} \times 1000}{\frac{D}{3} + \frac{C4}{2} + I_{\text{CH}} + \frac{C2}{2} + A}$$

$$I_{\text{CH}} = \frac{D - \frac{3A}{2}}{3}$$

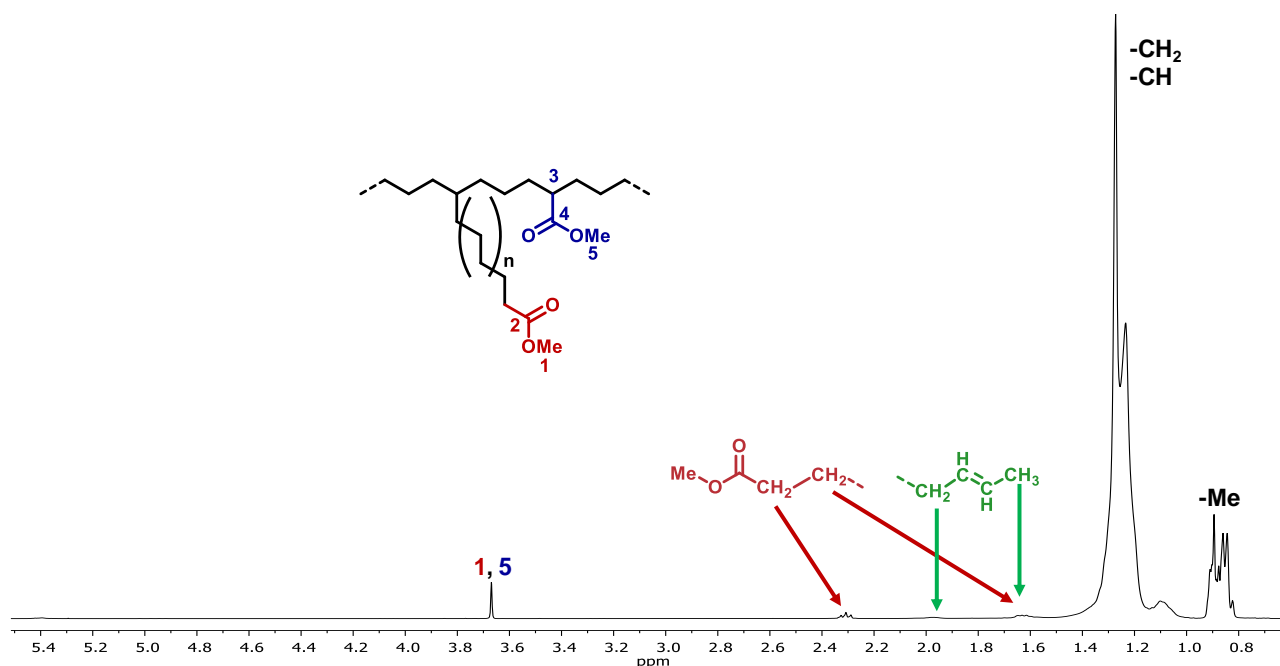

**Figure S21** <sup>1</sup>H NMR spectrum (CDCl<sub>3</sub>, 298 K) of ethylene/methyl acrylate copolymer obtained with **Pd2b** in DCM/TFE mixture of  $\chi_{\text{TFE}} = 0.09$  (Table S3, entry 2).

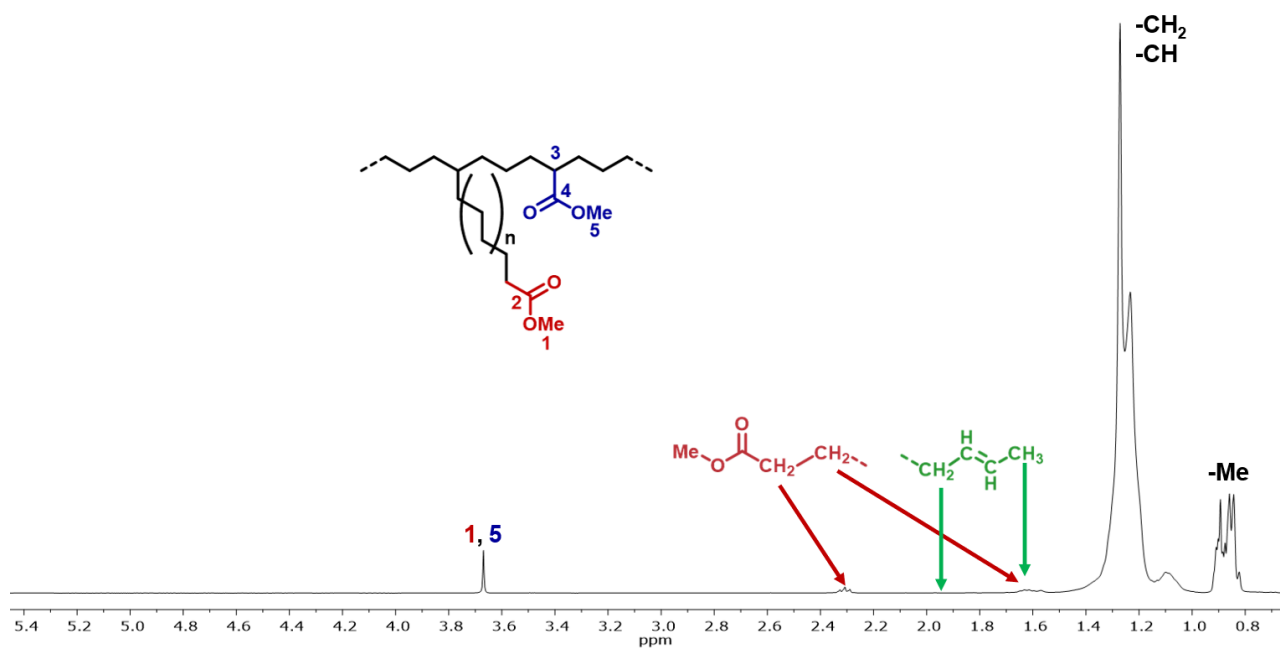

**Figure S22** <sup>1</sup>H NMR spectrum (CDCl<sub>3</sub>, 298 K) of ethylene/methyl acrylate copolymer obtained with **Pd2b** in neat TFE (Table S3, entry 10).

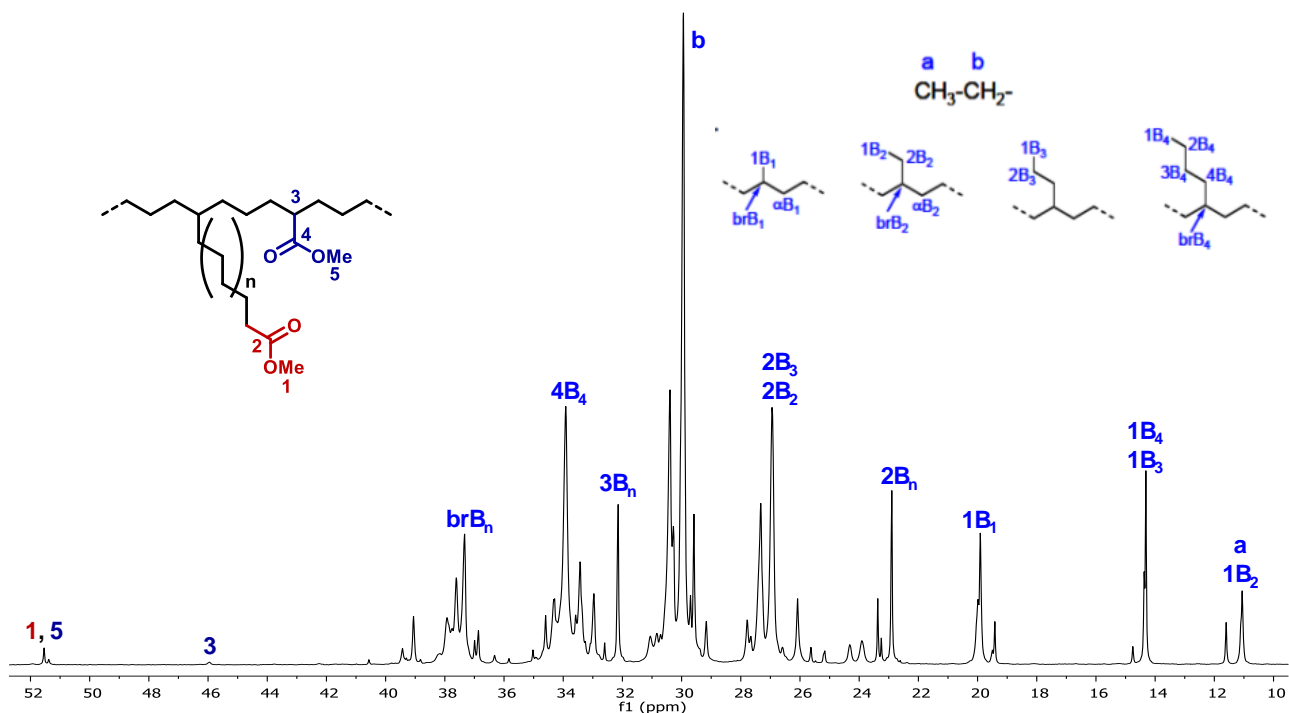

**Figure S23**  $^{13}\text{C}$  NMR spectrum ( $\text{CDCl}_3$ , 298 K) of ethylene/methyl acrylate copolymer obtained with **Pd2b** in neat TFE (Table S3, entry 10). Aliphatic region.

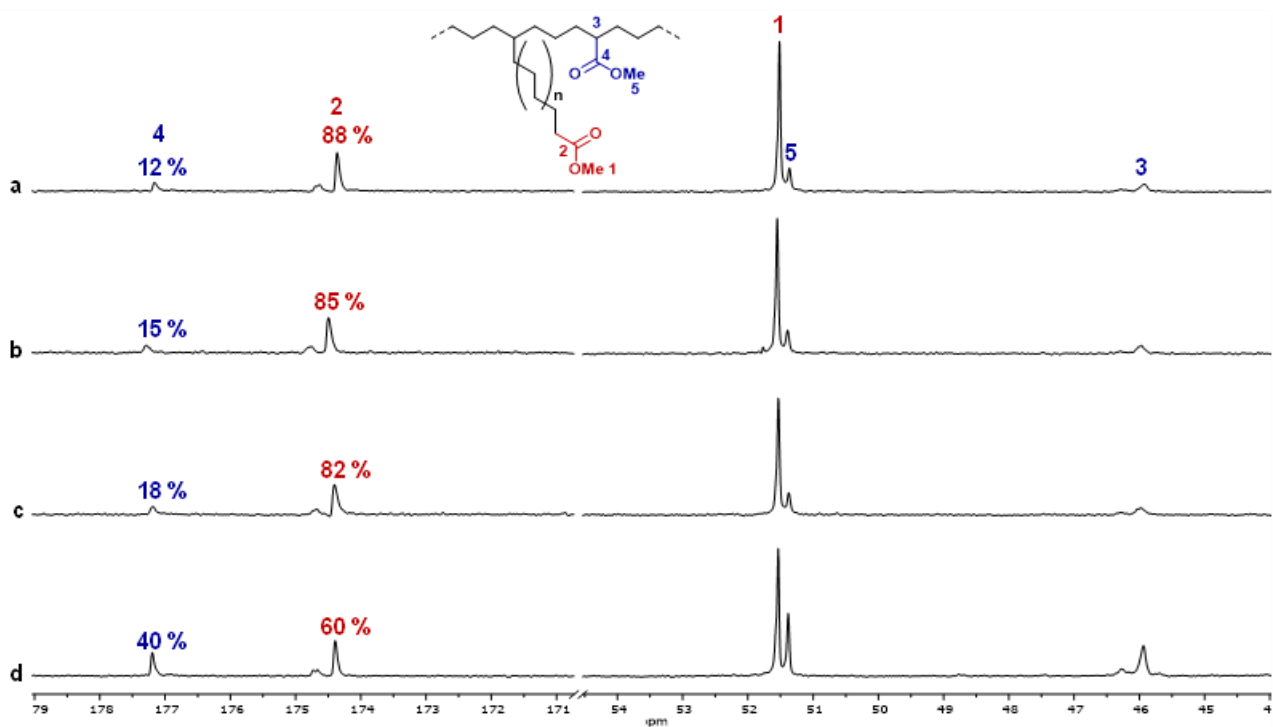

**Figure S24**  $^{13}\text{C}$  NMR spectra ( $\text{CDCl}_3$ , 298 K) of the macromolecules obtained with **Pd1b** in different reaction media: a)  $\chi_{\text{TFE}} = 0.00$ , b)  $\chi_{\text{TFE}} = 0.17$ , c)  $\chi_{\text{TFE}} = 0.47$ , d)  $\chi_{\text{TFE}} = 1.00$  (Figure 1b; Table S1; carbonyl and aliphatic regions are not in scale).

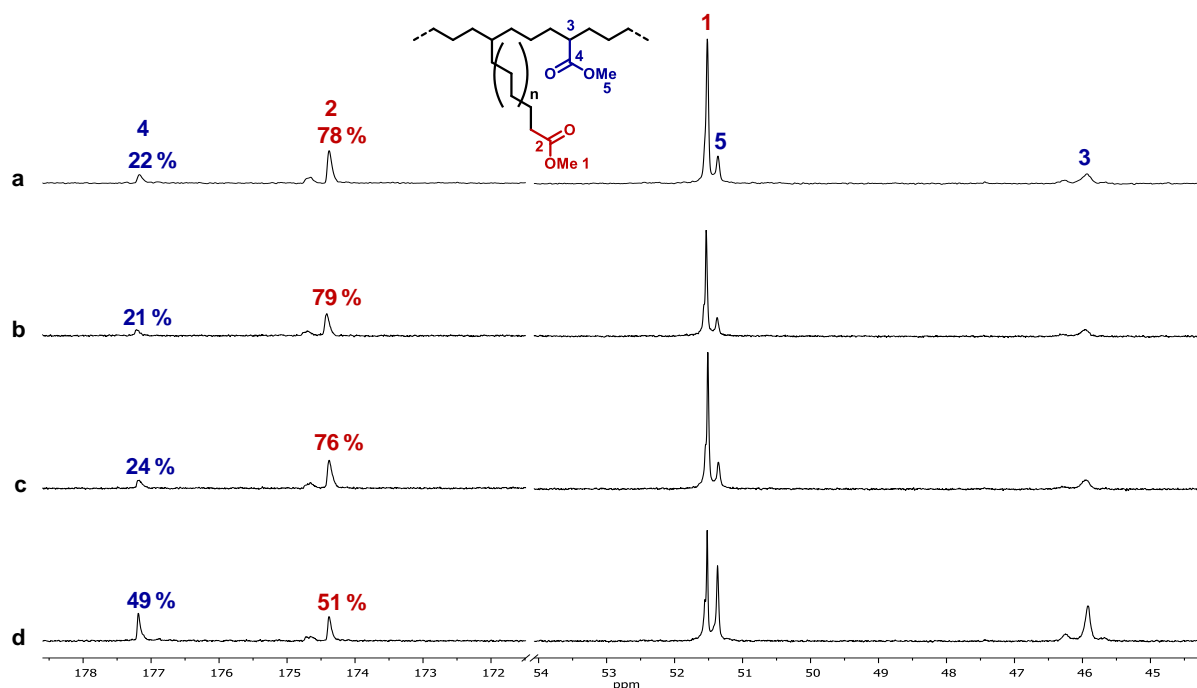

**Figure S25**  $^{13}\text{C}$  NMR spectra ( $\text{CDCl}_3$ , 298 K) of the macromolecules obtained with **Pd3b** in different reaction media: a)  $\chi_{\text{TFE}} = 0.00$ , b)  $\chi_{\text{TFE}} = 0.17$ , c)  $\chi_{\text{TFE}} = 0.47$ , d)  $\chi_{\text{TFE}} = 1.00$  (Figure 1b; Table S2; carbonyl and aliphatic regions are not in scale).

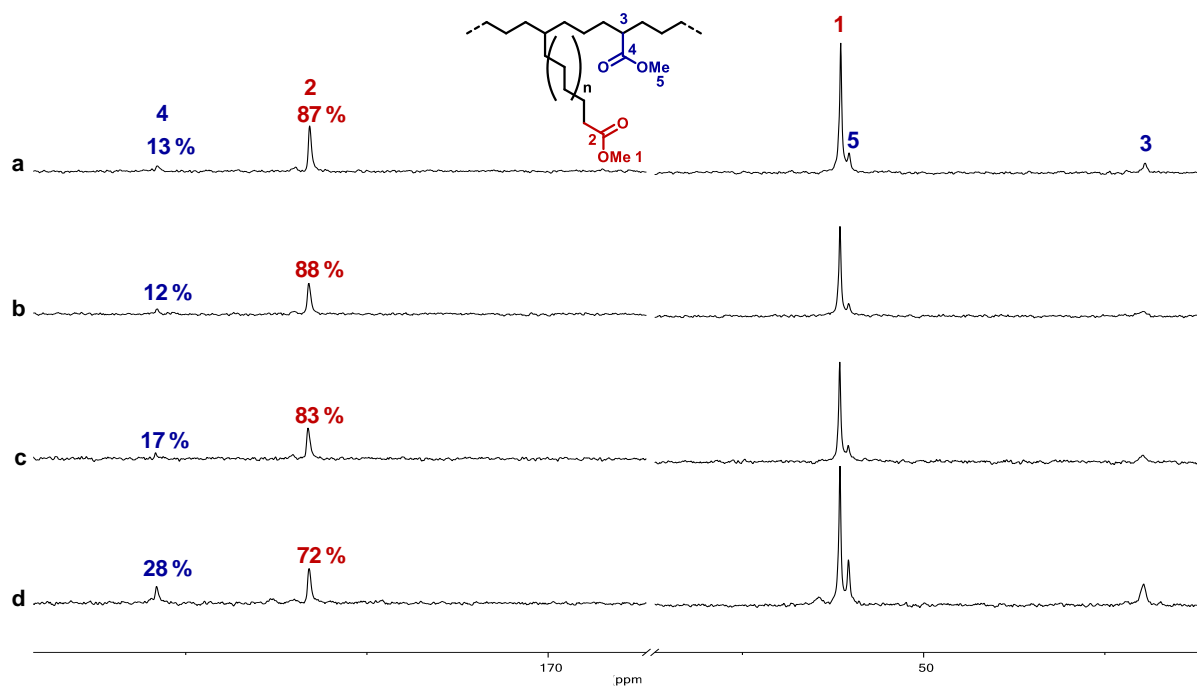

**Figure S26**  $^{13}\text{C}$  NMR spectra ( $\text{CDCl}_3$ , 298 K) of the macromolecules obtained with **Pd2b** in different reaction media: a)  $\chi_{\text{TFE}} = 0.00$ , b)  $\chi_{\text{TFE}} = 0.09$ , c)  $\chi_{\text{TFE}} = 0.47$ , d)  $\chi_{\text{TFE}} = 1.00$  (Figure 1b; Table S3; carbonyl and aliphatic regions are not in scale).

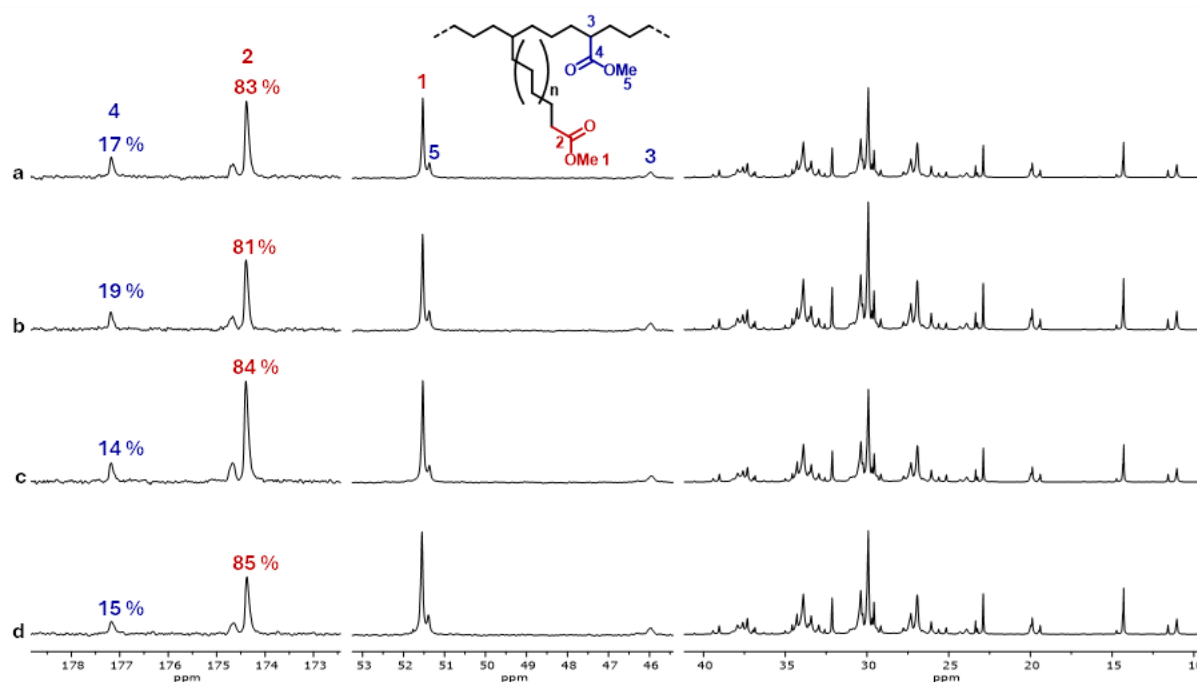

**Figure S27**  $^{13}\text{C}$  NMR spectra ( $\text{CDCl}_3$ , 298 K) of E/MA copolymers obtained with **Pd1b**. Catalyst recycle experiments of Table 1, entries: a) 1, b) 2, c) 3, d) Ref1 (carbonyl and aliphatic regions are not in scale).

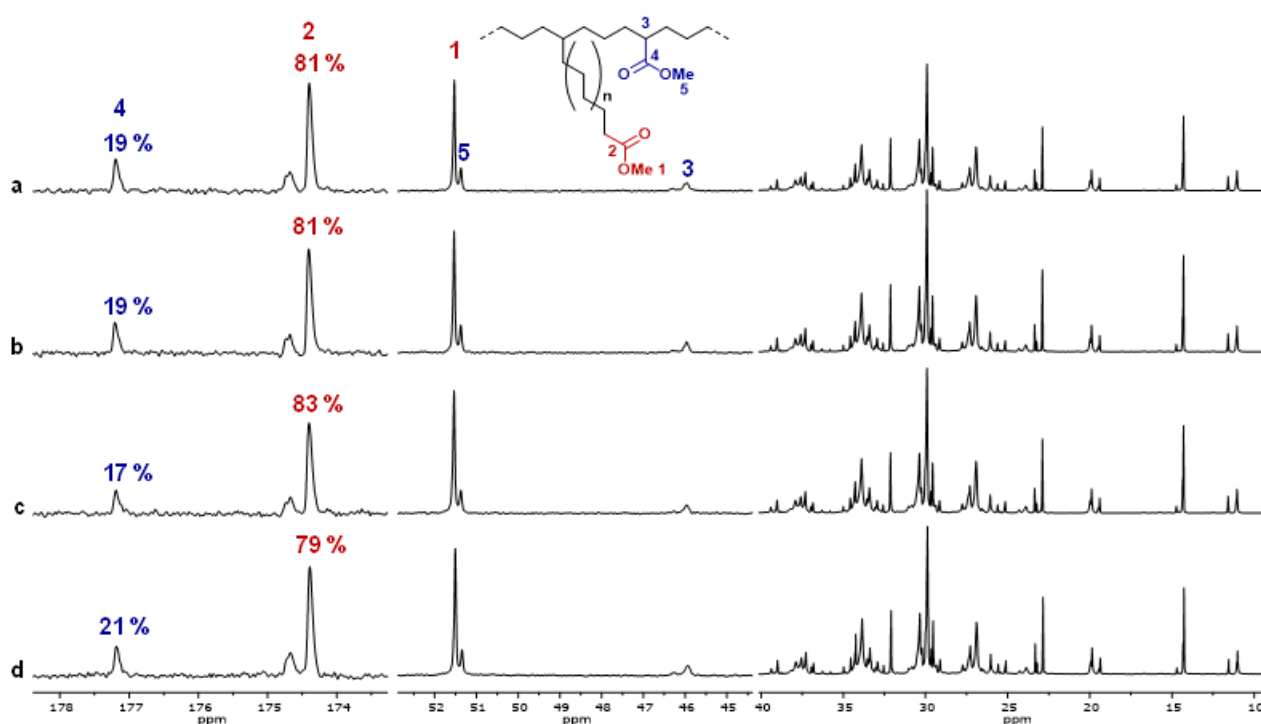

**Figure S28**  $^{13}\text{C}$  NMR spectra ( $\text{CDCl}_3$ , 298 K) of E/MA copolymers obtained with **Pd3b**. Catalyst recycle experiments of Table 1, entries: a) 4, b) 5, c) 6, d) Ref3 (carbonyl and aliphatic regions are not in scale).

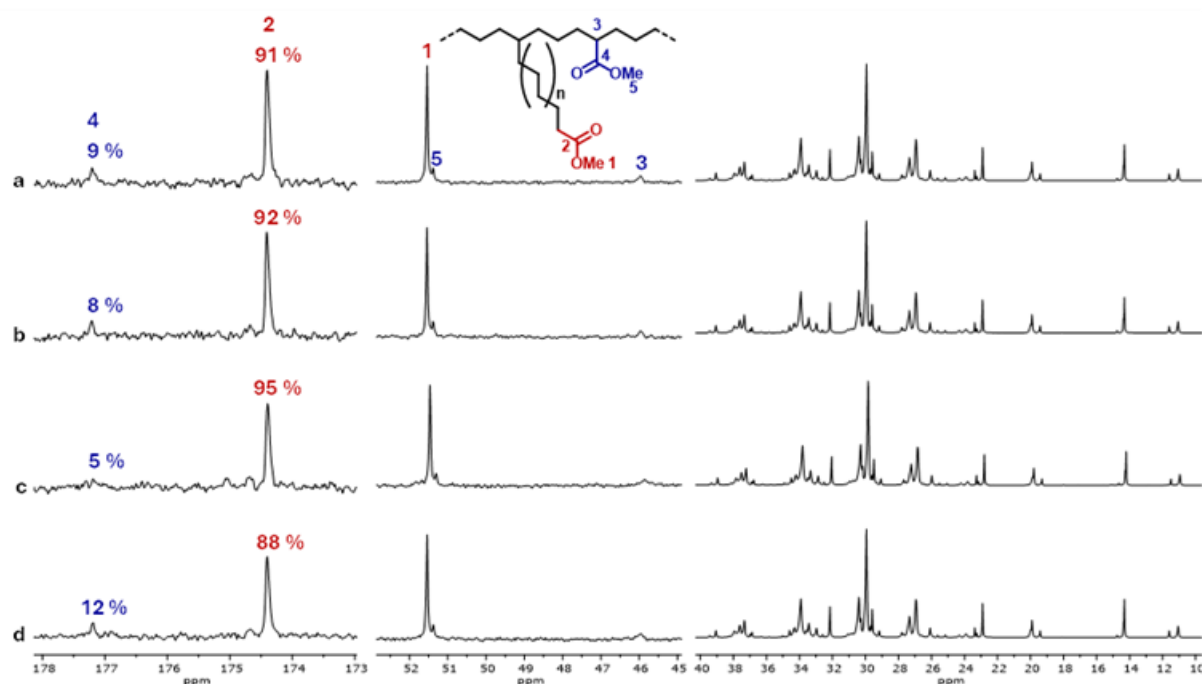

**Figure S29**  $^{13}\text{C}$  NMR spectra ( $\text{CDCl}_3$ , 298 K) of E/MA copolymers obtained with **Pd2b**. Catalyst recycle experiments of Table 1, entries: a) 7, b) 8, c) 9, d) Ref2 (carbonyl and aliphatic regions are not in scale).

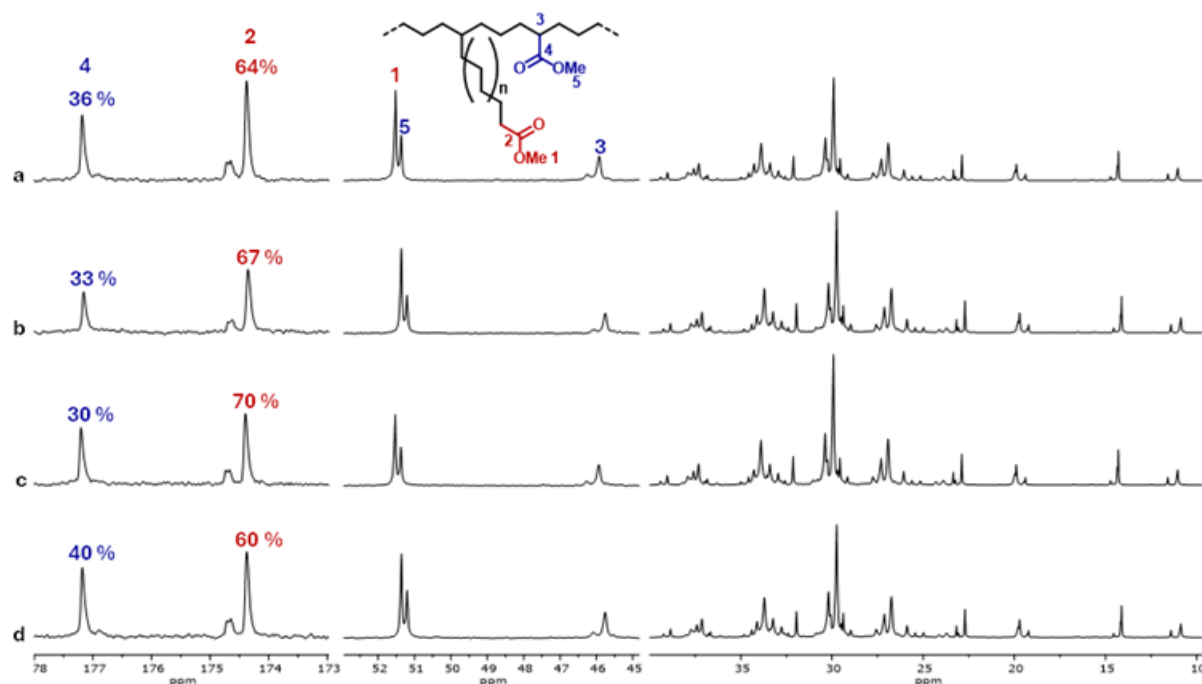

**Figure S30**  $^{13}\text{C}$  NMR spectra ( $\text{CDCl}_3$ , 298 K) of E/MA copolymers obtained with **Pd1b**. Catalyst recycle experiments of Table 2, entries: a) 1, b) 2, c) 3, d) Ref1 (carbonyl and aliphatic regions not in scale).

**NMR assignments for the palladium organometallic compounds (MC6, MC5 and OC1) present in the solution of the reaction between Pd1b and MA carried out in the CD<sub>2</sub>Cl<sub>2</sub>/TFE-d<sub>3</sub> mixture of  $\chi_{\text{TFE}} = 0.17$ .**

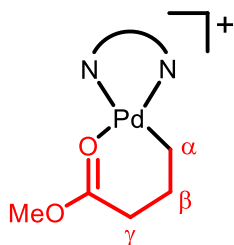

**MC6:** the signals of the CH<sub>2</sub> groups were assigned on the basis of <sup>1</sup>H, <sup>1</sup>H COSY and <sup>1</sup>H, <sup>13</sup>C HSQC spectra (Figures S33 and S34): in particular  $\beta$ CH<sub>2</sub> falls at 0.71 ppm, while  $\alpha$ CH<sub>2</sub> and  $\gamma$ CH<sub>2</sub> are at 1.29 and 2.41 ppm, respectively. The OCH<sub>3</sub> resonates at 3.12 ppm (based on <sup>1</sup>H, <sup>1</sup>H COSY, Figure S33). Thanks to the correlation peaks in the <sup>1</sup>H, <sup>13</sup>C HMBC spectrum (Figure S35) between the signal

of the CH<sub>2</sub> group close to the carbonyl moiety and the OMe group of inserted MA, we established that the carbon atom of the C=O group resonates at 183.3 ppm.

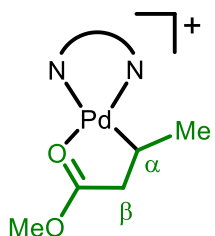

**MC5:** the signal at 0.32 ppm was assigned to the methyl group. Starting from this peak, on the basis of <sup>1</sup>H, <sup>1</sup>H COSY spectrum (Figure S33), it was possible to assign the signal at 1.41 ppm to  $\alpha$ CH. The signal at 3.54 ppm, related to the methoxy group, was assigned based on literature data.[4]

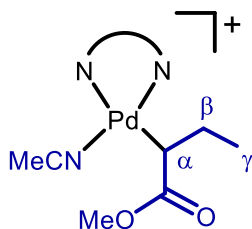

**OC1:** the signals of the CH<sub>2</sub> groups were assigned on the basis of <sup>1</sup>H, <sup>1</sup>H COSY and <sup>1</sup>H, <sup>13</sup>C HSQC spectra (Figures S33 and S34, respectively):  $\gamma$ Me falls at 0.58 ppm, the signals related to  $\beta$ CH<sub>2</sub> are at 1.20 and 1.31 ppm, while the signal of  $\alpha$ CH<sub>2</sub> is found at 1.84 ppm. The OCH<sub>3</sub> resonates at 3.52 ppm (based on <sup>1</sup>H, <sup>1</sup>H

COSY, Figure S33). Thanks to the correlation peaks in the <sup>1</sup>H, <sup>13</sup>C HMBC spectrum (Figure S35), we established that the carbon atom of the C=O group resonates at 179.3 ppm. Finally, the singlet of coordinated acetonitrile (Pd-NCMe) is found at 1.76 ppm.

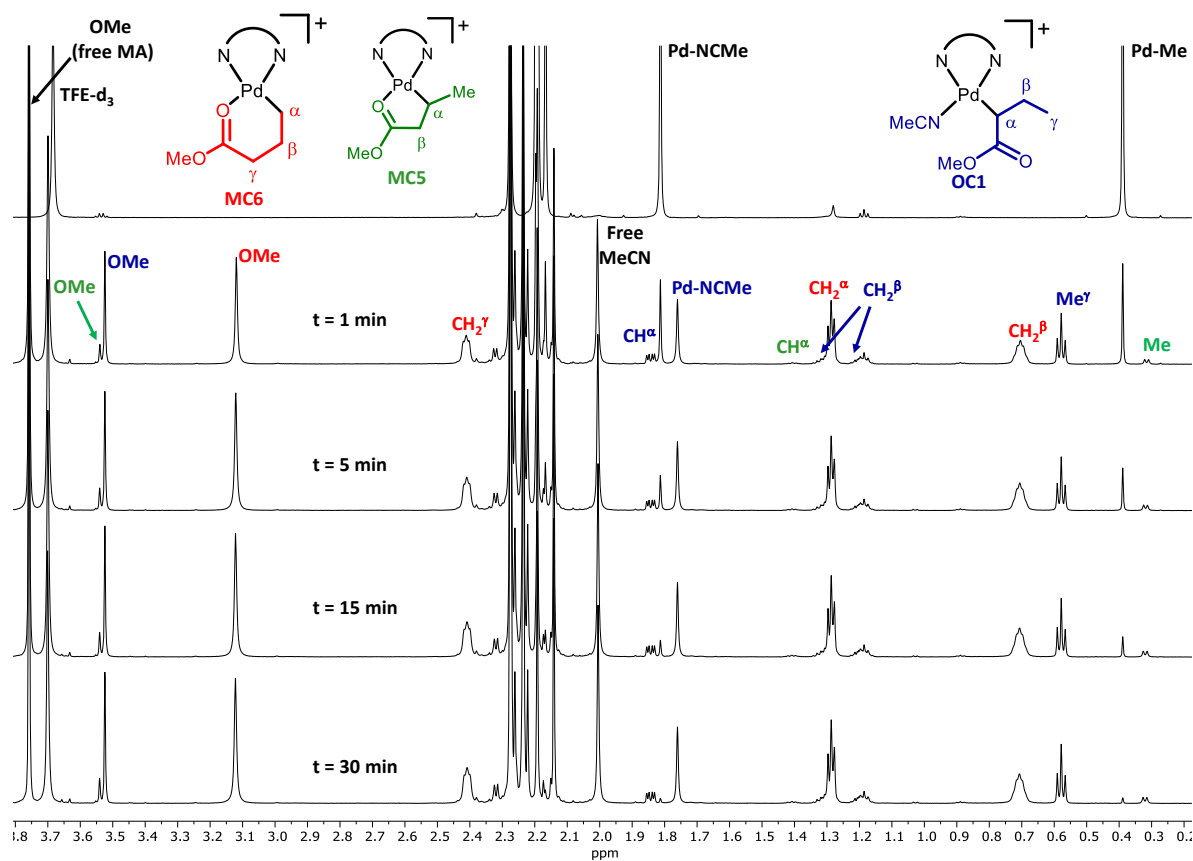

**Figure S31.**  $^1\text{H}$  NMR spectra ( $\text{CD}_2\text{Cl}_2/\text{TFE-d}_3$  mixture at  $\chi_{\text{TFE}} = 0.17$ ,  $T = 298\text{ K}$ ) of **Pd1b** (top spectrum) and of **Pd1b** after the addition of methyl acrylate at different reaction times. Region of aliphatic protons.

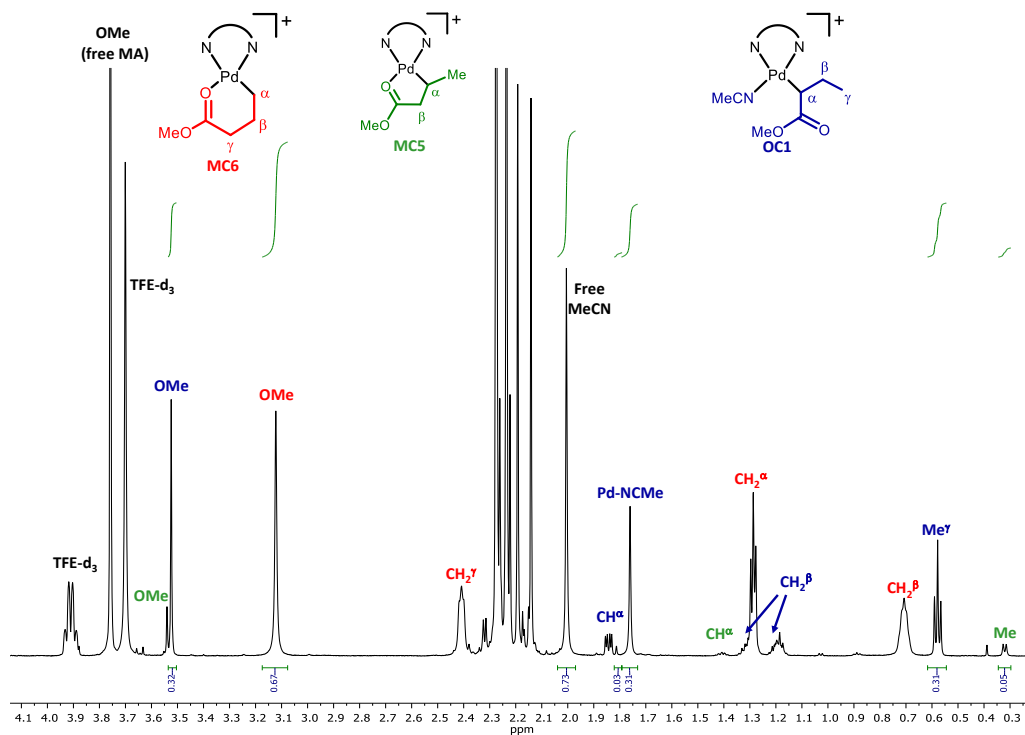

**Figure S32.**  $^1\text{H}$  NMR spectrum ( $\text{CD}_2\text{Cl}_2/\text{TFE-d}_3$  mixture at  $\chi_{\text{TFE}} = 0.17$ ,  $T = 298\text{ K}$ ) of the reaction mixture of **Pd1b** with methyl acrylate at  $t = 30\text{ min}$ . Region of aliphatic protons.

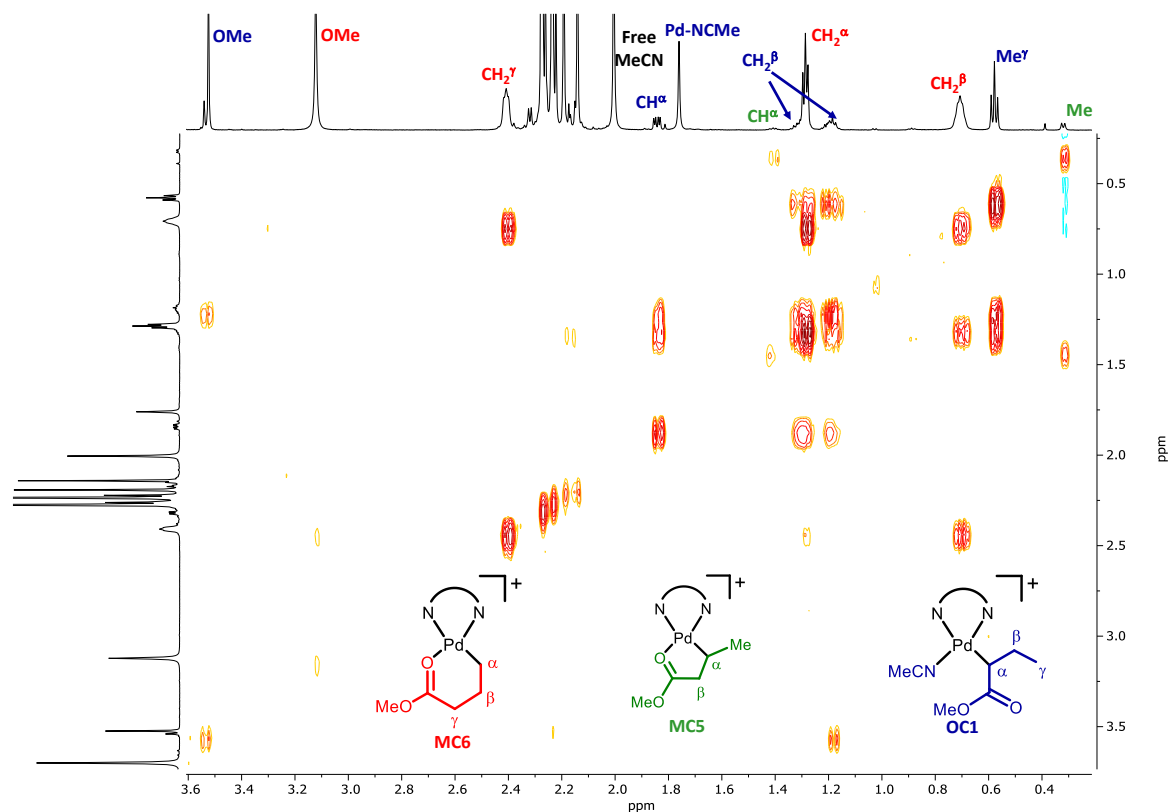

**Figure S33.**  $^1\text{H}, ^1\text{H}$  COSY spectrum ( $\text{CD}_2\text{Cl}_2/\text{TFE-d}_3$  mixture at  $\chi_{\text{TFE}} = 0.17$ ,  $T = 298\text{ K}$ ) of the reaction mixture of **Pd1b** with methyl acrylate at  $t = 30\text{ min}$ . Region of aliphatic protons.

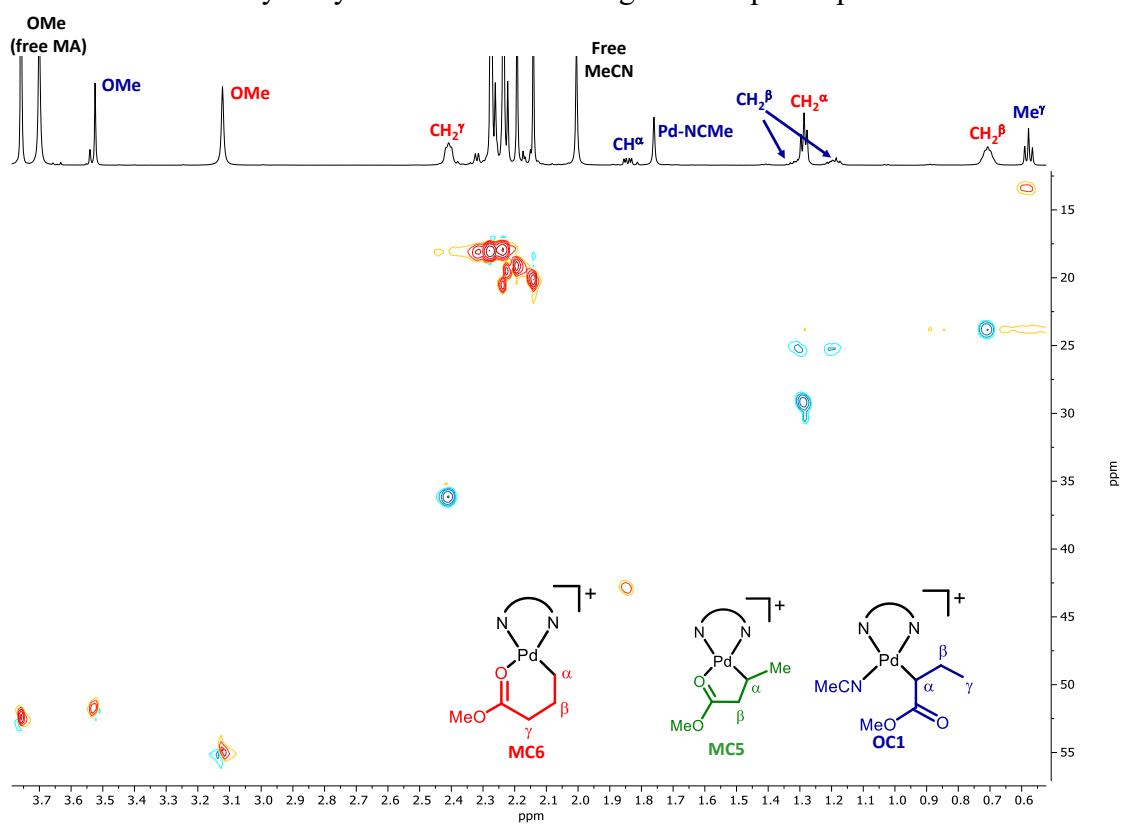

**Figure S34.**  $^1\text{H}, ^{13}\text{C}$  HSQC spectrum ( $\text{CD}_2\text{Cl}_2/\text{TFE-d}_3$  mixture at  $\chi_{\text{TFE}} = 0.17$ ,  $T = 298\text{ K}$ ) of the reaction mixture of **Pd1b** with methyl acrylate at  $t = 30\text{ min}$ . Red cross peaks are due to  $\text{CH}_3$  and  $\text{CH}$ , light blue cross peaks are due to  $\text{CH}_2$ . Region of aliphatic protons.

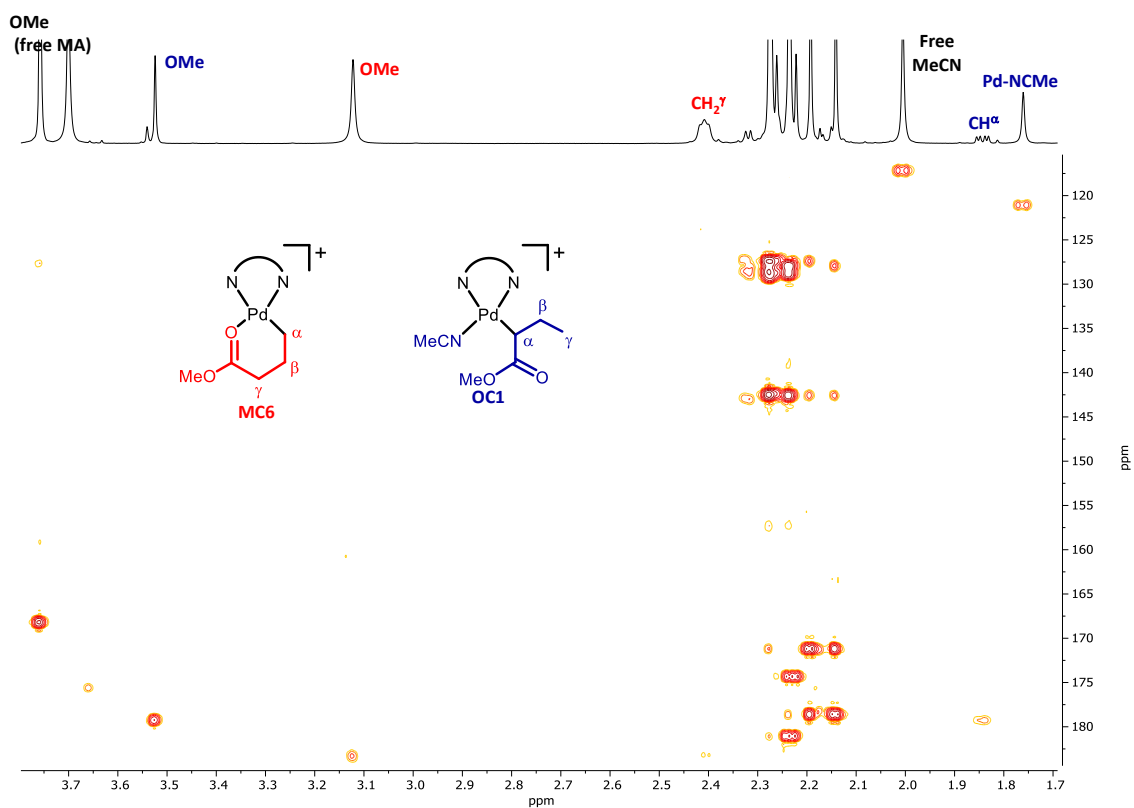

**Figure S35.**  $^1\text{H}$ ,  $^{13}\text{C}$  HMBC spectrum ( $\text{CD}_2\text{Cl}_2/\text{TFE-d}_3$  mixture at  $\chi_{\text{TFE}} = 0.17$ ,  $T = 298\text{ K}$ ) of the reaction mixture of **Pd1b** with methyl acrylate at  $t = 30\text{ min}$ . Region of aliphatic protons.

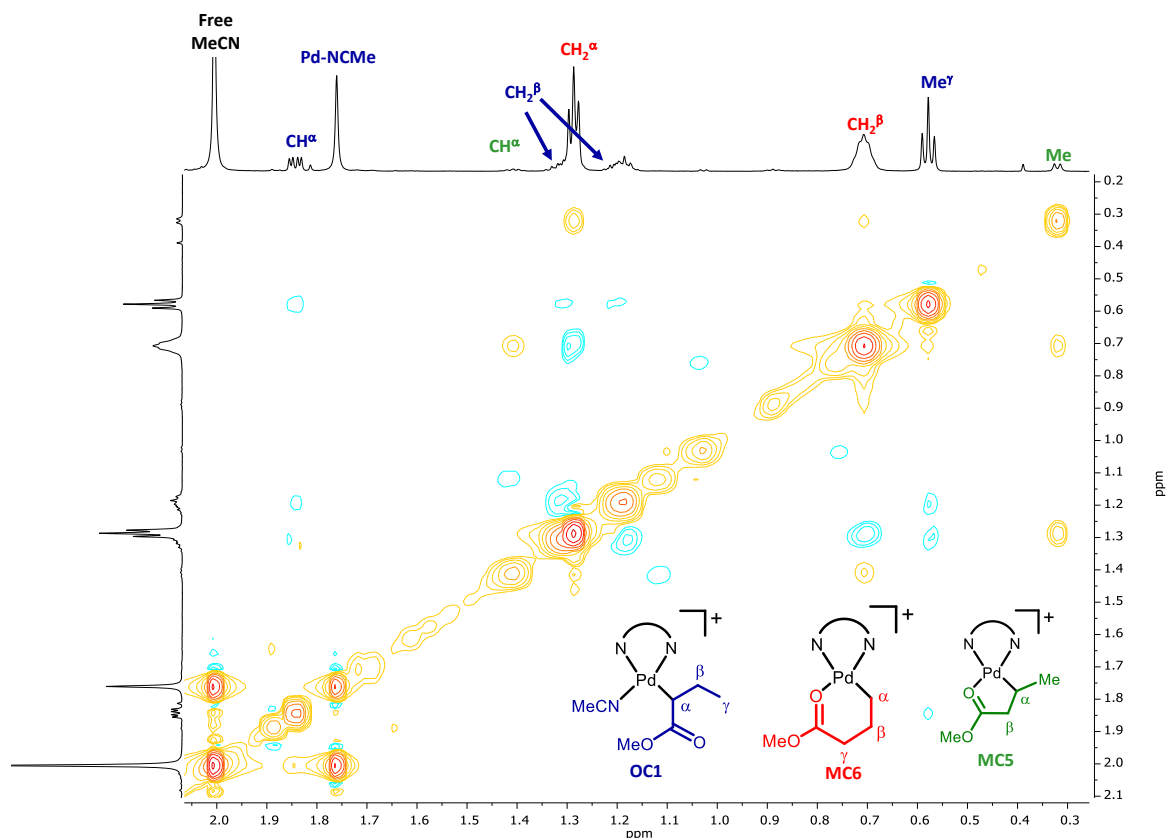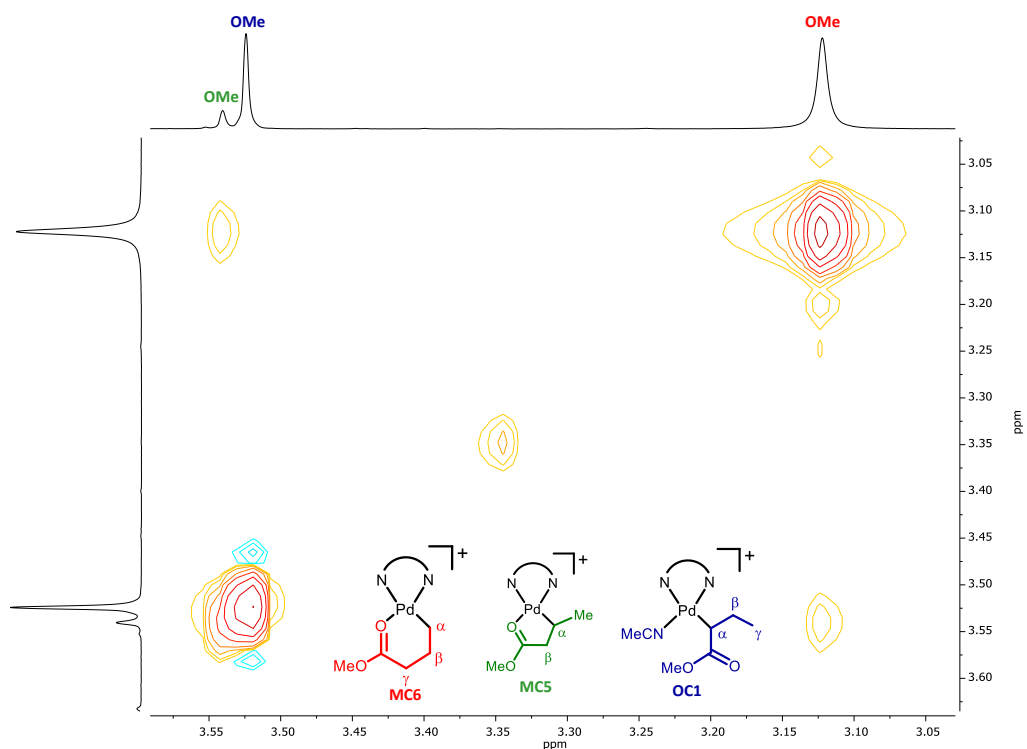

**Figure S36.**  $^1\text{H}$ ,  $^1\text{H}$  NOESY spectrum ( $\text{CD}_2\text{Cl}_2/\text{TFE-d}_3$  mixture at  $\chi_{\text{TFE}} = 0.17$ ,  $T = 298$  K) of the reaction mixture of **Pd1b** with methyl acrylate at  $t = 30$  min. Yellow cross peaks are due to exchange process, light blue cross peaks are due to nuclear Overhauser effect. Top spectrum: region of aliphatic protons; bottom spectrum: region of methoxy groups.

**NMR assignments for the palladium organometallic compounds (MC6, MC5 and OC1) present in the solution of the reaction between Pd1b and MA carried out in the CD<sub>2</sub>Cl<sub>2</sub>/TFE-d<sub>3</sub> mixture of  $\chi_{\text{TFE}} = 0.79$ .**



**MC6:** the signals of the CH<sub>2</sub> groups were assigned on the basis of <sup>1</sup>H, <sup>1</sup>H COSY and <sup>1</sup>H, <sup>13</sup>C HSQC spectra (Figures S39 and S40): in particular βCH<sub>2</sub> falls at 0.69 ppm, while αCH<sub>2</sub> and γCH<sub>2</sub> are at 1.32 and 2.37 ppm, respectively. The signal of the methoxy group of inserted MA, found at 3.11 ppm, was assigned based on literature data.[4]

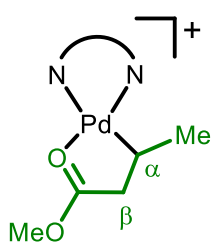

**MC5:** the signal at 0.34 ppm was assigned to the methyl group. Starting from this peak, on the basis of <sup>1</sup>H, <sup>1</sup>H COSY spectrum (Figure S39), it was possible to assign the signal at 1.43 ppm to αCH. The signal at 3.51 ppm, related to the methoxy group, was assigned based on literature data.[4]

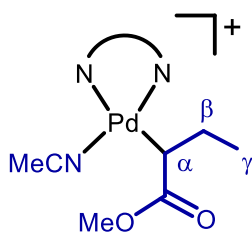

**OC1:** the signals of the CH<sub>2</sub> groups were assigned on the basis of <sup>1</sup>H, <sup>1</sup>H COSY and <sup>1</sup>H, <sup>13</sup>C HSQC spectra (Figures S39 and S40, respectively): γMe falls at 0.59 ppm, the signals related to βCH<sub>2</sub> are at 1.24 and 1.34 ppm, while the signal of αCH<sub>2</sub> is found at 1.92 ppm. Thanks to the correlation peaks in the <sup>1</sup>H, <sup>13</sup>C

HMBC spectrum (Figure S41), we established that the carbon atom of the C=O group resonates at 179.0 ppm. The singlet in the <sup>1</sup>H NMR spectrum that shows the same correlation with the C=O group, assigned to the methoxy group, is found at 3.54 ppm. The singlet due to coordinated acetonitrile (Pd-NCMe) is found at 1.71 ppm.

**Table S4.** The relative amount, in mol%, of the palladium organometallic compounds present in solution in the reaction of **Pd1b** with MA carried out in CD<sub>2</sub>Cl<sub>2</sub>/TFE-d<sub>3</sub> mixtures of different composition, at the time of complete reaction of **Pd1b**.

| Time required for complete reaction of Pd1b (min) | $\chi_{\text{TFE}}^a$ | MC6 | MC5               | MC4               | OC1               |
|---------------------------------------------------|-----------------------|-----|-------------------|-------------------|-------------------|
| 120 <sup>b</sup>                                  | 0                     | 67  | 5                 | 28                | n.d. <sup>c</sup> |
| 30                                                | 0.17                  | 65  | 5                 | n.d. <sup>c</sup> | 30                |
| 5                                                 | 0.79                  | 53  | 4                 | n.d. <sup>c</sup> | 43                |
| 1 <sup>b</sup>                                    | 1                     | 61  | n.d. <sup>c</sup> | n.d. <sup>c</sup> | 39                |

<sup>a</sup>Molar fraction of TFE-d<sub>3</sub> in the mixture CD<sub>2</sub>Cl<sub>2</sub>/TFE-d<sub>3</sub>. <sup>b</sup>Values from reference 4. <sup>c</sup>n.d. = not detected.

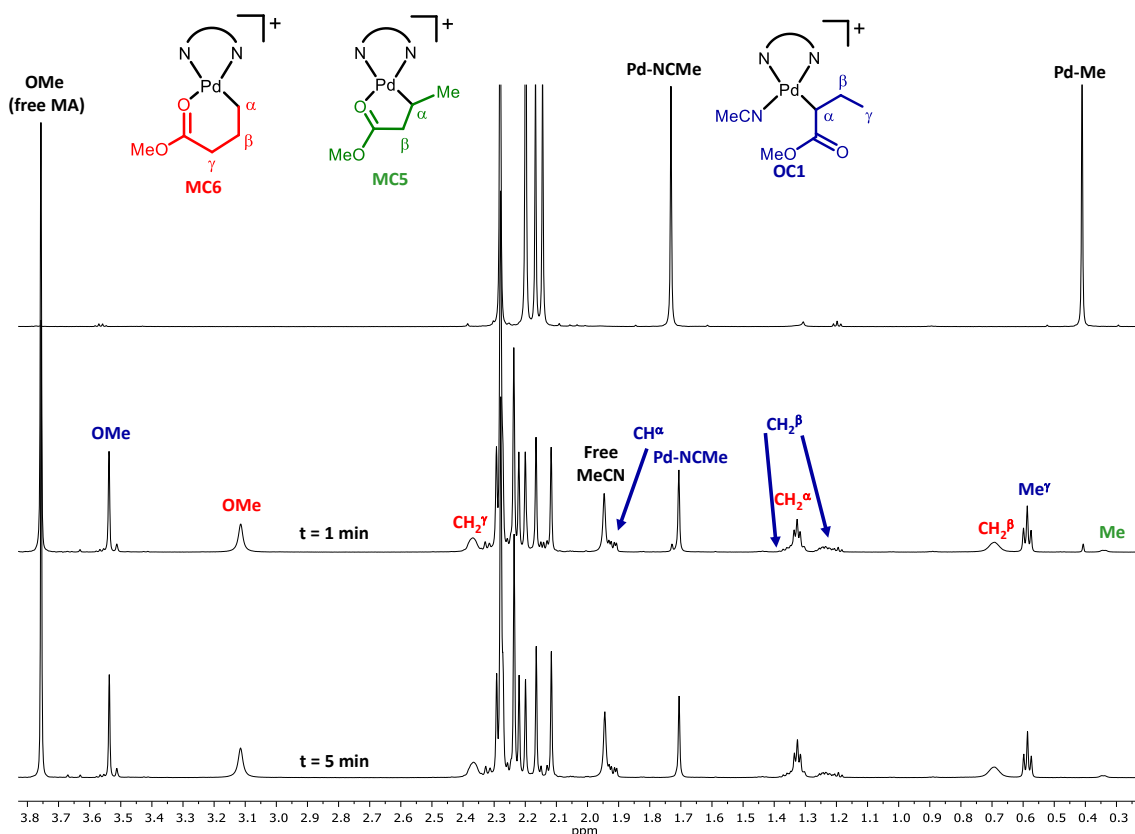

**Figure S37.** <sup>1</sup>H NMR spectra (CD<sub>2</sub>Cl<sub>2</sub>/TFE-d<sub>3</sub> mixture at  $\chi_{\text{TFE}} = 0.79$ , T = 298 K) of Pd1b (top spectrum) and of Pd1b after the addition of methyl acrylate at different reaction times. Region of aliphatic protons.

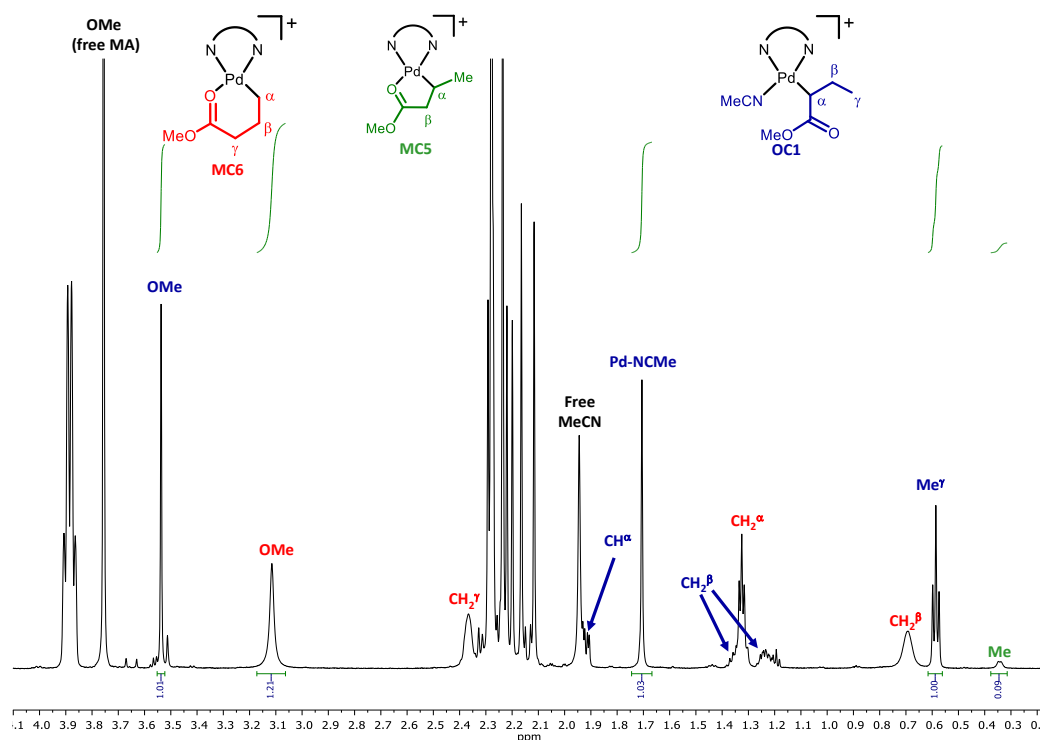

**Figure S38.** <sup>1</sup>H NMR spectrum (CD<sub>2</sub>Cl<sub>2</sub>/TFE-d<sub>3</sub> mixture at  $\chi_{\text{TFE}} = 0.79$ , T = 298 K) of the reaction mixture of Pd1b with methyl acrylate at t = 5 min. Region of aliphatic protons.

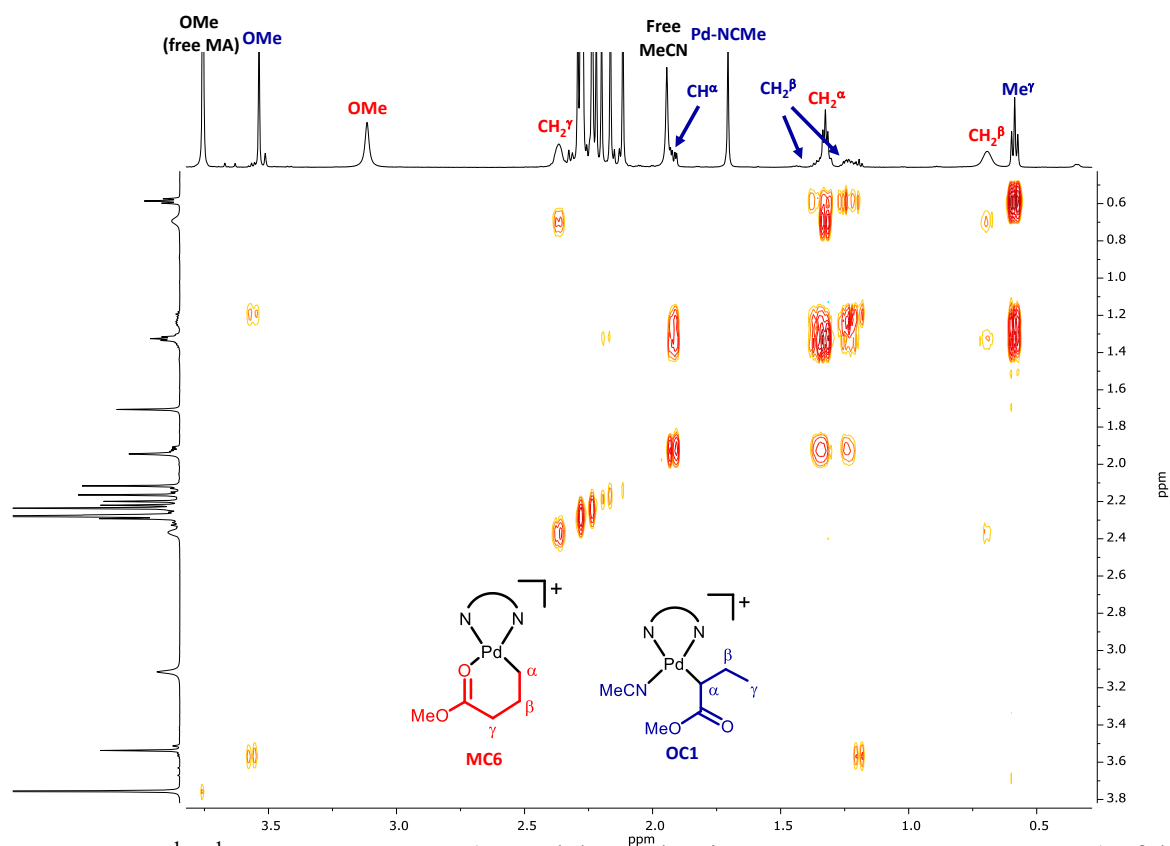

**Figure S39.**  $^1\text{H}$ ,  $^1\text{H}$  COSY spectrum ( $\text{CD}_2\text{Cl}_2/\text{TFE}-d_3$  mixture at  $\chi_{\text{TFE}} = 0.79$ ,  $T = 298\text{ K}$ ) of the reaction mixture of **Pd1b** with methyl acrylate at  $t = 5$  min. Region of aliphatic protons.

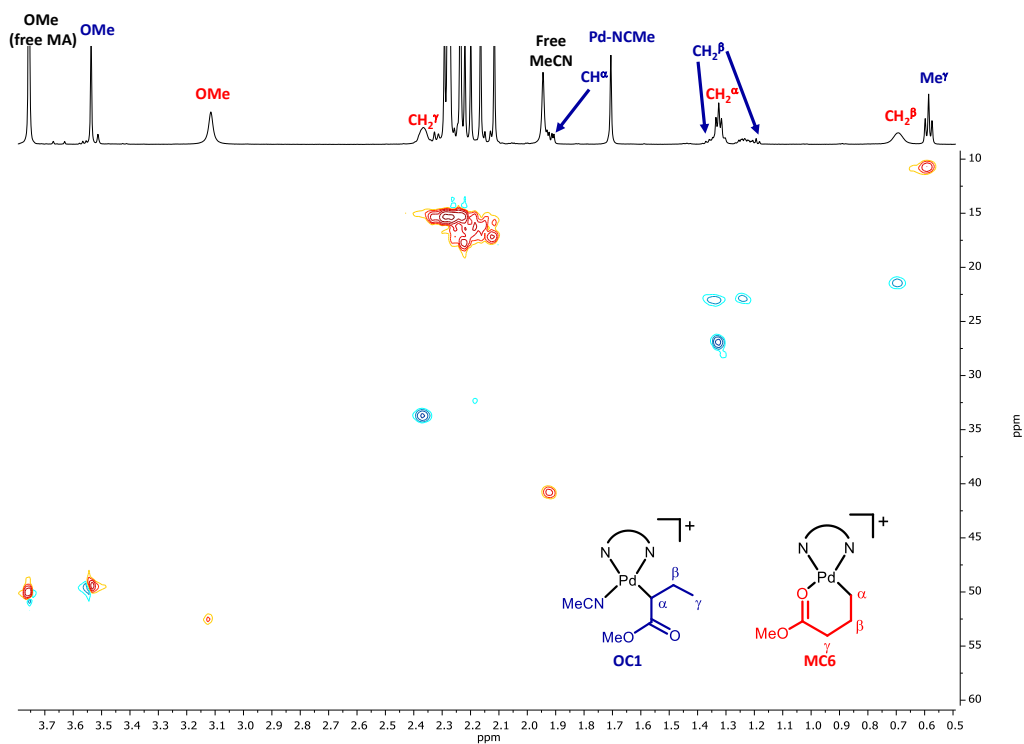

**Figure S40.**  $^1\text{H}$ ,  $^{13}\text{C}$  HSQC spectrum ( $\text{CD}_2\text{Cl}_2/\text{TFE}-d_3$  mixture at  $\chi_{\text{TFE}} = 0.79$ ,  $T = 298\text{ K}$ ) of the reaction mixture of **Pd1b** with methyl acrylate at  $t = 5$  min. Red cross peaks are due to  $\text{CH}_3$  and  $\text{CH}$ , light blue cross peaks are due to  $\text{CH}_2$ . Region of aliphatic protons.

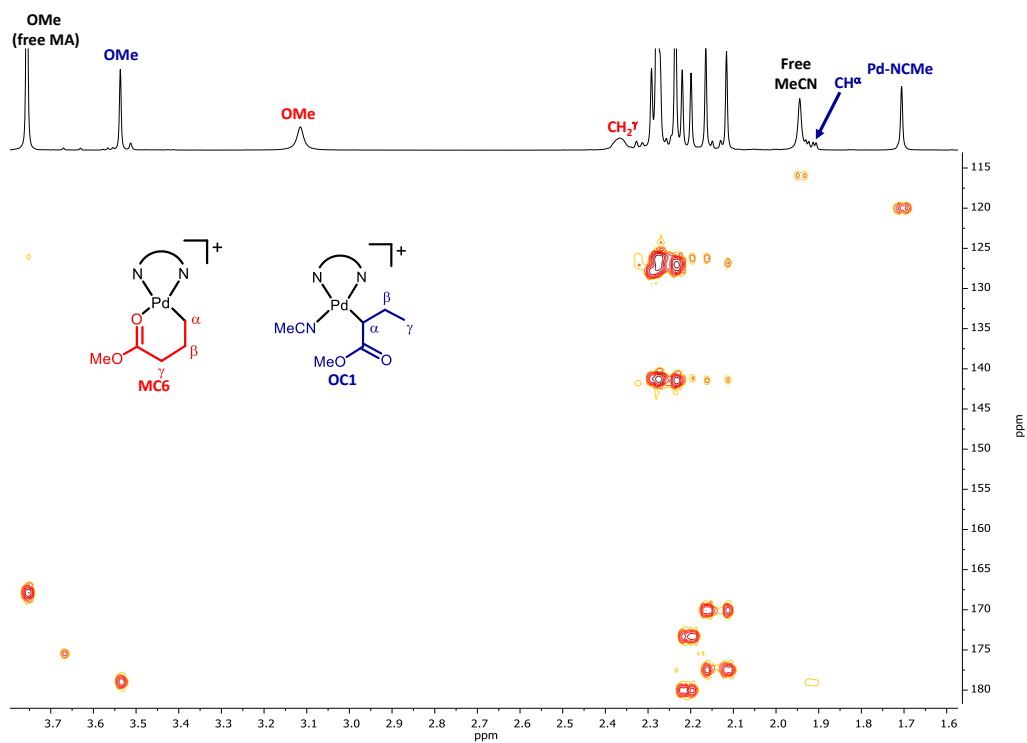

**Figure S41.**  $^1\text{H}$ ,  $^{13}\text{C}$  HMBC spectrum ( $\text{CD}_2\text{Cl}_2/\text{TFE-d}_3$  mixture at  $\chi_{\text{TFE}} = 0.79$ ,  $T = 298$  K) of the reaction mixture of **Pd1b** with methyl acrylate at  $t = 5$  min. Region of aliphatic protons.

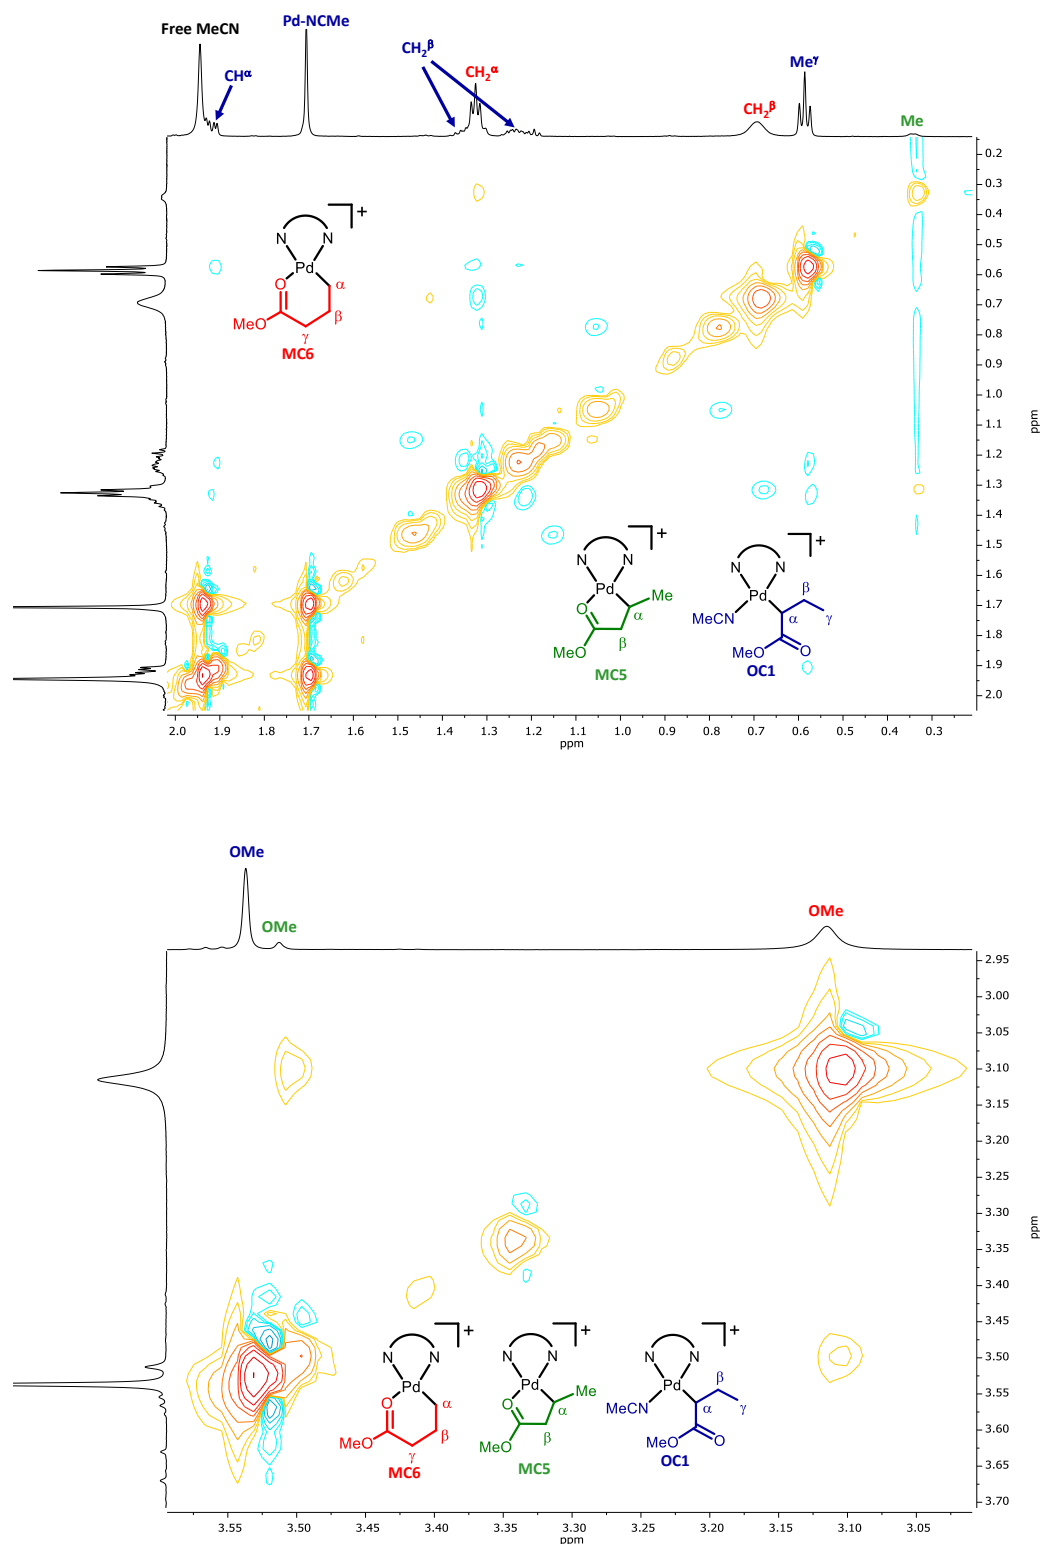

**Figure S42.** <sup>1</sup>H, <sup>1</sup>H NOESY spectrum (CD<sub>2</sub>Cl<sub>2</sub>/TFE-d<sub>3</sub> mixture at  $\chi_{\text{TFE}} = 0.79$ , T = 298 K) of the reaction mixture of **Pd1b** with methyl acrylate at t = 5 min. Yellow cross peaks are due to exchange process, light blue cross peaks are due to nuclear Overhauser effect. Top spectrum: region of aliphatic protons; bottom spectrum: region of methoxy groups.

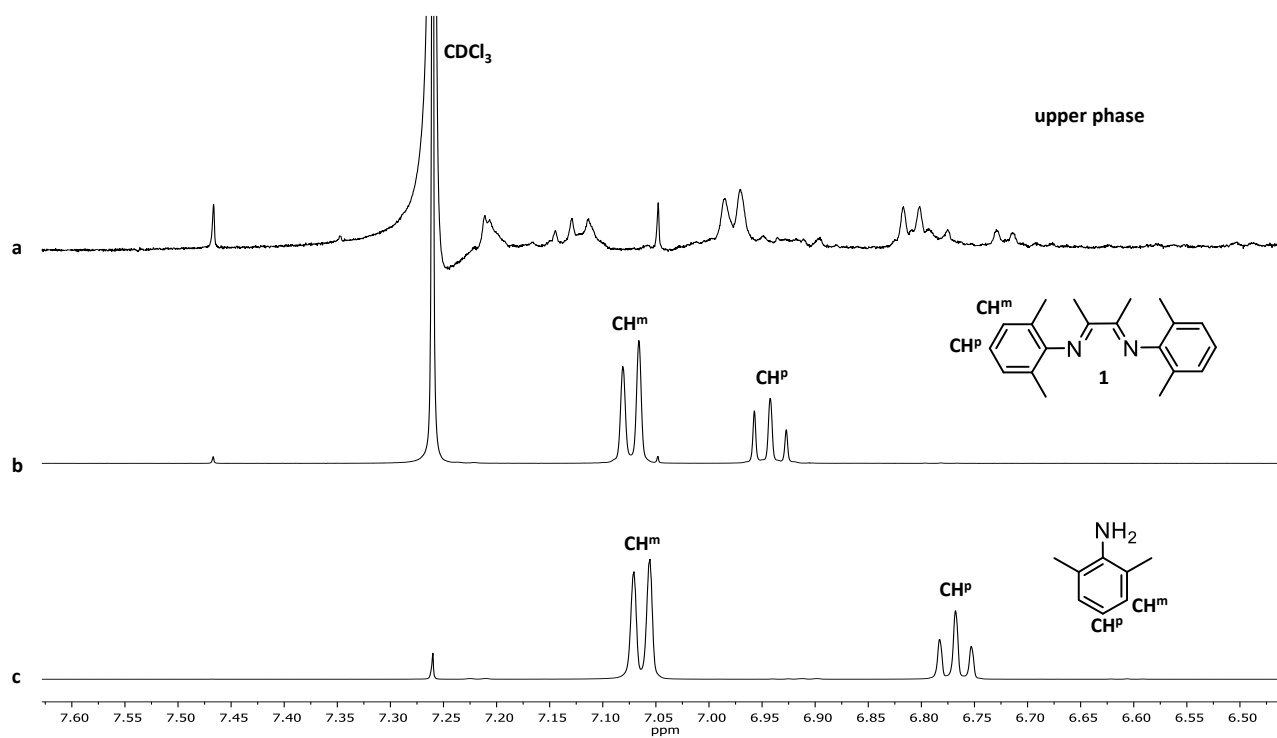

**Figure S43.**  $^1\text{H}$  NMR spectra ( $\text{CDCl}_3$ ,  $T = 298\text{ K}$ ) of: a) lower phase of the reaction mixture at the end of the catalytic run with **Pd1b** at  $\chi_{\text{TFE}} = 0.17$ ; b) ligand **1**; c) 2,6-dimethylaniline. Region of aromatic protons.

## References

1. L. K. Johnson, C. M. Killian and M. Brookhart, *J. Am. Chem. Soc.*, 1995, **117**, 6414-6415.
2. H. A. Zhong, J. A. Labinger and J. E. Bercaw, *J. Am. Chem. Soc.*, 2002, **124**, 1378-1399.
3. V. Rosar, T. Montini, G. Balducci, E. Zangrando, P. Fornasiero and B. Milani, *ChemCatChem*, 2017, **9**, 3402-3411.
4. C. Alberoni, M. C. D'Alterio, G. Balducci, B. Immirzi, M. Polentarutti, C. Pellecchia and B. Milani, *ACS Catal.*, 2022, **12**, 3430-3443.
5. L. Guo, J. Li, W. Zhao, P. Wei, Y. Ju, X. Cui, L. Yuan, M. Ji and Z. Liu, *Inorg. Chem.*, 2024, **63**, 17809-17827.
