# Supplementary material
Source: Royal Society of Chemistry journal article supplement (doi:10.1039/d6cy00332j)
Supplement: d6cy00332j2.pdf [file d6cy00332j2.pdf]

## Supporting information

### **Pd(II)-catalyzed ethylene/methyl acrylate copolymerization: toward catalyst recovery and recycle.**

Karim Abdel Hady,<sup>1,2</sup> Daniele Quattrin,<sup>1</sup> Linda de Marchi,<sup>1</sup> Enzo Alessio,<sup>1</sup> Barbara Milani<sup>1,\*</sup>

<sup>1</sup>Dipartimento di Scienze Chimiche e Farmaceutiche, Università di Trieste, Via Licio Giorgieri 1, 34127 Trieste, Italy.

<sup>2</sup>Consorzio Interunivesitario Reattività Chimica e Catalisi CIRCC, Via Celso Ulpiani 27, 70126 Bari, Italy.

email: milaniba@units.it

## Ethylene/methyl acrylate copolymerization experiments

**Table S1** Ethylene/methyl acrylate copolymerization: effect of solvent composition.<sup>[a]</sup>

Precatalyst: [Pd(1)(Me)(MeCN)][PF<sub>6</sub>] **Pd1b**.

| entry             | $\chi_{\text{TFE}}^{[b]}$ | yield<br>[g] | kg<br>CP/mol<br>Pd <sup>[c]</sup> | mol %<br>MA <sup>[d]</sup> | M(MA):T(MA) <sup>[e]</sup> | $M_n^{[f]}$ [kDa]<br>( $M_w/M_n$ ) | Bd <sup>[g]</sup> |
|-------------------|---------------------------|--------------|-----------------------------------|----------------------------|----------------------------|------------------------------------|-------------------|
| 1 <sup>[h]</sup>  | 0.00                      | 1.04         | 49.4                              | 4.8                        | 12:88                      | 5.0 (2.00)                         | 93                |
| 2                 | 0.09                      | 2.42         | 114.9                             | 3.0                        | 14:85                      | 16.6 (1.69)                        | 99                |
| 3                 | 0.17                      | 2.97         | 141.8                             | 2.4                        | 15:85                      | 18.2 (1.72)                        | 101               |
| 3BIS              |                           | 2.92         | 139.0                             | 2.2                        | 15:85                      |                                    | 103               |
| 4                 | 0.26                      | 2.67         | 126.9                             | 2.8                        | 13:87                      | 18.2 (1.70)                        | 102               |
| 5                 | 0.35                      | 1.89         | 89.7                              | 4.1                        | 10:90                      | 18.8 (1.53)                        | 99                |
| 5BIS              |                           | 1.92         | 91.2                              | 3.6                        | 11:89                      |                                    | 100               |
| 6                 | 0.47                      | 2.86         | 136.1                             | 2.3                        | 18:82                      | 18.5 (1.54)                        | 104               |
| 7                 | 0.59                      | 2.41         | 115.1                             | 2.4                        | 21:79                      | 19.3 (1.60)                        | 103               |
| 8                 | 0.79                      | 1.94         | 92.3                              | 2.9                        | 26:74                      | 23.2 (1.70)                        | 100               |
| 9                 | 0.89                      | 1.61         | 76.6                              | 2.8                        | 28:72                      | 24.3 (1.75)                        | 100               |
| 10 <sup>[h]</sup> | 1.00                      | 1.02         | 48.8                              | 4.0                        | 40:60                      | 23.4 (1.19)                        | 93                |

<sup>[a]</sup>Reaction conditions:  $n_{\text{Pd}} = 2.1 \cdot 10^{-5}$  mol,  $V_{\text{sol}} = 21$  mL,  $V_{\text{MA}} = 2.26$  mL,  $[\text{MA}]/[\text{Pd}] = 1188$ ,  $T = 308$  K,  $P_E = 5$  bar,  $t = 6$  h; <sup>[b]</sup> $\chi_{\text{TFE}} = n_{\text{TFE}}/(n_{\text{DCM}} + n_{\text{TFE}})$ ; <sup>[c]</sup>productivity as kg CP/mol Pd = kilograms of copolymer per mol of palladium; <sup>[d]</sup>calculated by <sup>1</sup>H NMR spectroscopy on isolated product; <sup>[e]</sup>calculated by <sup>13</sup>C NMR spectroscopy on isolated product; <sup>[f]</sup>molecular weight ( $M_n$  and  $M_w$ ) and molecular weight distribution ( $M_w/M_n$ ) were measured by GPC; <sup>[g]</sup>Bd = branching degree as branches per 1000 carbon atoms, calculated by <sup>1</sup>H NMR spectroscopy on isolated product; <sup>[h]</sup>from reference 4.
